# Supplementary material for: Genotype Profile of Global EYS-Associated Inherited Retinal Dystrophy and Clinical Findings in a Large Chinese Cohort
Source: Front Cell Dev Biol. 2021 Jun 11;9:634220. doi: 10.3389/fcell.2021.634220 (PMC8226124; doi:10.3389/fcell.2021.634220)
Supplement: Supplementary file 2 [file Table_1.XLSX]

## Sheet: Sheet1
Table S1. Mutation and phenotypic information of patients in G2 group
Patient ID	Age		BCVA		Location1	Mutation1	Aminoacid1	Variant type	ACMG	Location2	Mutation2	Aminoacid2	Variant type	ACMG	Location3	Mutation3	Aminoacid3	Variant type	ACMG	Reference
	Exam	Onset	OD	OS
ARRP07-II:1	33	8	0.4	0.5	exon 32	c.6557G>A	p.G2186E	Missense	LP	exon 32	c.6557G>A	p.G2186E	Missense	LP	—	—	—	—		Gu et al., 2016
ARRP08-II:2	40	35	0.5	0.5	exon 43	c.9248G>A	p.G3083D	Missense	LP	exon 31	c.6416G>A	p.C2139Y	Missense	LP	—	—	—	—
ARRP09-II:1	56	20	0.4	0.4	exon 32	c.6557G>A	p.G2186E	Missense	LP	Intron 36	c.7228+1G>A	—	Splicing	P	—	—	—	—
ARRP10-II:3	41	32	0.5	0.5	Intron 36	c.7228+1G>A	—	Splicing	P	exon 26	c.4957dupA	p.S1653Kfs*2	Frameshift	P	—	—	—	—
II:1	—	20	0.05	HM	exon 26	c.5506G>T	p.E1836X	Nonsense	P	exon 26	c.5506G>T	p.E1836X	Nonsense	P	—	—	—	—		Huang et al., 2010
II:2	40	15	0.05	0.05	exon 26	c.5506G>T	p.E1836X	Nonsense	P	exon 26	c.5506G>T	p.E1836X	Nonsense	P	—	—	—	—
ARRP05-II:3	40	22	FC	FC	exon 4	c.490C>T	p.R164X	Nonsense	P	exon 31	c.6416G>A	p.C2139Y	Missense	LP	—	—	—	—		Chen et al., 2015
ARRP06-II:2	54	18	LP	LP	exon 41	c.7919G>A	p.W2640X	Nonsense	P	exon 43	c.8861T>C	p.F2954S	Missense	LP	—	—	—	—
No.10-II:4	—	36	—	—	exon 31	c.6416G>A	p.C2139Y	Missense	LP	exon 32	c.6557G>A	p.G2186E	Missense	LP	—	—	—	—		Abd El-Aziz et al., 2010
RP28	—	—	—	—	exon 11	c.1765A>G	p.R589G	Missense	LP	exon 39	c.7665C>G	p.Y2555X	Nonsense	P	—	—	—	—
P1	58	—	0.29	0.33	exon 43	c.9383_9387delAATTA	p.K3128Rfs*7	Frameshift	P	Intron 32	c.6571+5G>A	—	Splicing	LP	—	—	—	—		Sengillo et al., 2018
P2	46	—	1	0.8	exon 41	c.8012T>A	p.L2671X	Nonsense	P	exon 31	c.6416G>A	p.C2139Y	Missense	LP	exon 11	c.1641_1644delTCAG	p.S547Rfs*62	Frameshift	P
P3	66	—	1	0.025	exon 7	c.1155T>A	p.C385X	Nonsense	P	exon 43	c.8648_8655delCATGCAGA	p.T2883Kfs*4	Frameshift	P	—	—	—	—
P4	33	—	1	1	exon 23	c.3555C>G	p.C1185W	Missense	LP	exon 42	c.8111T>G	p.L2704X	Nonsense	P	—	—	—	—
P5	83	—	0.2	0.25	exon 43	c.9286_9295delGTAAATATCG	p.V3096Lfs*28	Frameshift	P	exon 43	c.9286_9295delGTAAATATCG	p.V3096Lfs*28	Frameshift	P	—	—	—	—
P6	44	—	0.16	0.2	exon 43	c.8413dupA	p.T2805Nfs*7	Frameshift	P	Intron 22	c.3443+1G>T	—	Splicing	P	—	—	—	—
P7	65	—	0.4	0.33	exon 42	c.8111T>G	p.L2704X	Nonsense	P	exon 43	c.9317_9336delCCAATTTTGTTGGCAAAATT	p.T3106Kfs*13	Frameshift	P	—	—	—	—
P8	37	—	1	1	exon 12	c.1961_1962insA	p.N654Kfs*5	Frameshift	P	exon 27-28	E-27_28 dup	—	CNV	P	—	—	—	—
P9	61	—	0.4	0.8	exon 33	c.6714delT	p.I2239Sfs*17	Frameshift	P	exon 43	c.9299_9302delCTCA	p.T3100Kfs*26	Frameshift	P	—	—	—	—
P10	28	—	1	0.8	Intron 38	c.7578+1G>A	—	Splicing	P	Intron 38	c.7578+1G>A	—	Splicing	P	—	—	—	—
P11	58	—	1	0.8	exon 11	c.1645G>T	p.E549X	Nonsense	P	Intron 19	c.2992+1G>A	—	Splicing	P	—	—	—	—
P12	54	—	LP	LP	exon 34	c.6794delC	p.P2265Qfs*46	Frameshift	P	exon 34	c.6794delC	p.P2265Qfs*46	Frameshift	P	—	—	—	—
P14	45	—	0.29	0.25	exon 6	c.963_979delAAAAGGATCTTCCAGCC	p.P321Pfs*4	Frameshift	P	exon 34	c.6794delC	p.P2265Qfs*46	Frameshift	P	—	—	—	—
P15	70	—	0.29	0.13	exon 9	c.1308C>A	p.C436X	Nonsense	P	exon 29	c.5928delG	p.R1976Sfs*11	Frameshift	P	—	—	—	—
P16	30	—	0.8	1	exon 26	c.4120C>T	p.R1374X	Nonsense	P	exon 26	c.4120C>T	p.R1374X	Nonsense	P	—	—	—	—
P1	70	—	0.63	0.63	exon 11	c.1682_1686delACATG	p.N561Ifs*7	Frameshift	P	exon 11	c.1682_1686delACATG	p.N561Ifs*7	Frameshift	P	—	—	—	—		Mucciolo et al., 2018
P2	70	—	0.67	0.67	exon 11	c.1682_1686delACATG	p.N561Ifs*7	Frameshift	P	exon 11	c.1682_1686delACATG	p.N561Ifs*7	Frameshift	P	—	—	—	—
P3	40	18	0.67	0.4	Intron 14	c.2259+1G>A	—	Splicing	P	Intron 14	c.2259+1G>A	—	Splicing	P	—	—	—	—
P4	33	22	1	1	exon 4	c.32dupT	p.M12Dfs*14	Frameshift	P	exon 31	c.6198_6201delGGGA	p.Q2066Hfs*16	Frameshift	P	—	—	—	—
P5	58	—	1	0.8	exon 42	c.8133_8137delCTTTC	p.F2712Cfs*33	Frameshift	P	exon 43	c.9383_9387delAATTA	p.K3128Rfs*7	Frameshift	P	—	—	—	—
P6	59	37	0.5	0.63	exon 26	c.4152delT	p.P1385Lfs*14	Frameshift	P	exon 22-26	E-22_26 del	—	CNV	P	—	—	—	—
P7	51	—	0.32	0.5	Intron 14	c.2259+1G>A	—	Splicing	P	Intron 14	c.2259+1G>A	—	Splicing	P	—	—	—	—
P8	70	23	LP	LP	exon 16	c.2542C>T	p.Q848X	Nonsense	P	exon 16	c.2542C>T	p.Q848X	Nonsense	P	—	—	—	—
P9	64	30	LP	LP	exon 16	c.2542C>T	p.Q848X	Nonsense	P	exon 43	c.9178A>C	p.I3060L	Missense	LP	—	—	—	—
P10	30	24	1	1	Intron 7	c.1184+1G>A	—	Splicing	P	exon 11	c.1765A>G	p.R589G	Missense	LP	—	—	—	—
RP011 II:2	29	19	0.63	0.63	exon 8	c.1260delG	p.N421Mfs*8	Frameshift	P	exon 31	c.6416G>A	p.C2139Y	Missense	LP	—	—	—	—		Jinda et al., 2014
RP019 I:2	49	47	0.25	0.32	exon 31	c.6416G>A	p.C2139Y	Missense	LP	exon 31	c.6416G>A	p.C2139Y	Missense	LP	—	—	—	—
RP027	51	50	0.16	0.25	exon 42	c.8107G>T	p.E2703X	Nonsense	P	exon 42	c.8107G>T	p.E2703X	Nonsense	P	—	—	—	—
F2-II:3	1	—	0.25	0.16	exon 41	c.8012T>A	p.L2671X	Nonsense	P	exon 31	c.6416G>A	p.C2139Y	Missense	LP	—	—	—	—		Xiao et al., 2019
F3-II:5	—	—	0.5	0.5	exon 41	c.8012T>A	p.L2671X	Nonsense	P	exon 31	c.6416G>A	p.C2139Y	Missense	LP	—	—	—	—
RP020	—	—	—	—	exon 43	c.8301_8302insT	p.I2768Yfs*44	Frameshift	P	exon 23	c.3489T>A	p.N1163K	Missense	US	—	—	—	—
W09–0046 IV:7	46	14	0.05	0.05	exon 43	c.9019G>T	p.D3007Y	Missense	LP	exon 43	c.9019G>T	p.D3007Y	Missense	LP	—	—	—	—		Siemiatkowska et al., 2011
I	56	56	0.8	0.3	exon 15	c.2308C>T	p.Q770X	Nonsense	P	exon 15	c.2308C>T	p.Q770X	Nonsense	P	—	—	—	—		Pierrache et al., 2019
II-1	35	35	0.8	1	exon 4-6	E-4_6 del	—	CNV	P	exon 4-6	E-4_6 del	—	CNV	P	—	—	—	—
III	19	19	1	0.9	exon 26	c.4350_4356delTATAGCT	p.I1451Pfs*3	Frameshift	P	exon 26	c.4350_4356delTATAGCT	p.I1451Pfs*3	Frameshift	P	—	—	—	—
IV	45	26	0.5	0.5	exon 33	c.6714delT	p.I2239Sfs*17	Frameshift	P	exon 33	c.6714delT	p.I2239Sfs*17	Frameshift	P	—	—	—	—
V	35	22	0.6	0.6	exon 26	c.4350_4356delTATAGCT	p.I1451Pfs*3	Frameshift	P	exon 26	c.5319_5342del	p.N1773_V1781delinsK	Non Frameshift	US	—	—	—	—
VI-1	15	14	0.6	0.8	exon 34	c.6799_6800delCA	p.Q2267Efs*15	Frameshift	P	exon 36	c.7095T>G	p.Y2365X	Nonsense	P	—	—	—	—
VII-1	35	35	0.8	1	Intron 28	c.5928-3_5928-1del	—	Splicing	P	Intron 28	c.5928-3_5928-1del	—	Splicing	P	—	—	—	—
VIII	40	26	0.9	0.8	exon 26	c.5167_5168delTT	p.L1723Gfs*6	Frameshift	P	exon 31-35	E-31_35 del	—	CNV	P	—	—	—	—
IX	53	46	0.56	0.7	exon 26	c.4350_4356delTATAGCT	p.I1451Pfs*3	Frameshift	P	exon 40	c.7811G>A	p.R2604H	Missense	US	—	—	—	—
X	40	38	0.8	0.8	exon 11	c.1673G>A	p.W558X	Nonsense	P	exon 18	c.2811C>A	p.C937X	Nonsense	P	—	—	—	—
XI	34	32	0.4	0.5	exon 26	c.4955C>G	p.S1652X	Nonsense	P	exon 43	c.8984T>A	p.I2995N	Missense	LP	—	—	—	—
XII	26	14	1	1	exon 41	c.7919G>A	p.W2640X	Nonsense	P	exon 41	c.7919G>A	p.W2640X	Nonsense	P	—	—	—	—
XIII	53	52	0.8	0.9	exon 43	c.9036delT	p.L3013Sfs*6	Frameshift	P	exon 43	c.9405T>A	p.Y3135X	Nonsense	P	—	—	—	—
XIV	50	50	0.9	1	exon 26	c.4350_4356delTATAGCT	p.I1451Pfs*3	Frameshift	P	exon 33	c.6714delT	p.I2239Sfs*17	Frameshift	P	—	—	—	—
XV	62	—	1	0.4	exon 4	c.32dupT	p.M12Dfs*14	Frameshift	P	exon 4	c.32dupT	p.M12Dfs*14	Frameshift	P	—	—	—	—
XVI	26	26	0.4	0.8	exon 7	c.1161delA	p.K387Nfs*34	Frameshift	P	exon 14	E-14 del	—	CNV	P	—	—	—	—
XVII	52	11	0.3	0.2	exon 26	c.4350_4356delTATAGCT	p.I1451Pfs*3	Frameshift	P	Intron 29	c.6079-2A>G	—	Splicing	P	—	—	—	—
XVIII	30	21	1	1	exon 26	c.4712C>G	p.S1571X	Nonsense	P	exon 32	c.6557G>A	p.G2186E	Missense	LP	—	—	—	—
XIX	27	27	1	1	exon 33	c.6714delT	p.I2239Sfs*17	Frameshift	P	Intron 8	c.1185-3C>T	—	Splicing	US	—	—	—	—
XX	66	26	0.2	0.3	exon 9	c.1376delG	p.C459Sfs*56	Frameshift	P	exon 4	E-4 del	—	CNV	P	—	—	—	—
XXI	30	28	0.7	0.5	exon 26	c.4045C>T	p.R1349X	Nonsense	P	exon 26	c.4045C>T	p.R1349X	Nonsense	P	—	—	—	—
XXIII	36	36	1	0.5	exon 43	c.9405T>A	p.Y3135X	Nonsense	P	exon 43	c.9405T>A	p.Y3135X	Nonsense	P	—	—	—	—
XXIV-1	28	—	0.2	0.2	exon 29	c.6050G>T	p.G2017V	Missense	US	exon 29	c.6050G>T	p.G2017V	Missense	US	—	—	—	—
XXV	55	—	0.3	0.5	exon 43	c.9405T>A	p.Y3135X	Nonsense	P	exon 43	c.9405T>A	p.Y3135X	Nonsense	P	—	—	—	—
RP3H	67	14	0.07	0.08	exon 26	c.4957dupA	p.S1653Kfs*2	Frameshift	P	exon 26	c.4957dupA	p.S1653Kfs*2	Frameshift	P	—	—	—	—		Suto et al., 2014
RP21H	55	20	LP	LP	exon 32	E-32 del	—	CNV	P	exon 32	E-32 del	—	CNV	P	—	—	—	—
RP35K	39	20	1	1	exon 43	c.8805C>A	p.Y2935X	Nonsense	P	exon 43	c.8805C>A	p.Y2935X	Nonsense	P	—	—	—	—
RP44K	34	14	0.4	CF	exon 26	c.4957dupA	p.S1653Kfs*2	Frameshift	P	exon 32	c.6557G>A	p.G2186E	Missense	LP	—	—	—	—
RP48K	36	13	0.6	0.6	exon 26	c.4957dupA	p.S1653Kfs*2	Frameshift	P	exon 26	c.4957dupA	p.S1653Kfs*2	Frameshift	P	—	—	—	—
RP54K	53	20	0.7	0.3	exon 26	c.4957dupA	p.S1653Kfs*2	Frameshift	P	exon 26	c.4957dupA	p.S1653Kfs*2	Frameshift	P	—	—	—	—
RP56K	74	20	0.04	0.2	exon 26	c.4957dupA	p.S1653Kfs*2	Frameshift	P	exon 43	c.8288T>G	p.L2763R	Missense	US	—	—	—	—
RP81K	51	20	0.6	0.6	exon 16	c.2522dupA	p.Y841X	Nonsense	P	exon 32	c.6557G>A	p.G2186E	Missense	LP	—	—	—	—
RP87N	64	50	1	0.8	exon 26	c.4957dupA	p.S1653Kfs*2	Frameshift	P	exon 40	c.7793G>A	p.G2598D	Missense	US	—	—	—	—
RP115N	30	12	0.6	0.6	exon 26	c.4957dupA	p.S1653Kfs*2	Frameshift	P	exon 26	c.4957dupA	p.S1653Kfs*2	Frameshift	P	—	—	—	—
RP04	53	—	0.2	0.03	exon 26	c.4957dupA	p.S1653Kfs*2	Frameshift	P	exon 26	c.4957dupA	p.S1653Kfs*2	Frameshift	P	—	—	—	—		Iwanami et al., 2012
RP08	67	—	0.3	0.3	exon 26	c.4957dupA	p.S1653Kfs*2	Frameshift	P	exon 16	c.2528G>A	p.G843E	Missense	LP	—	—	—	—
RP12	50	—	1	1	exon 26	c.4957dupA	p.S1653Kfs*2	Frameshift	P	exon 26	c.4957dupA	p.S1653Kfs*2	Frameshift	P	—	—	—	—
RP16	57	—	0.3	0.2	exon 26	c.4957dupA	p.S1653Kfs*2	Frameshift	P	exon 8	c.1211dupA	p.N404Kfs*3	Frameshift	P	—	—	—	—
RP28	33	—	0.7	0.7	exon 26	c.4957dupA	p.S1653Kfs*2	Frameshift	P	exon 16	c.2528G>A	p.G843E	Missense	LP	—	—	—	—
RP29	54	—	HM	HM	exon 43	c.8805C>A	p.Y2935X	Nonsense	P	exon 39	c.7665C>G	p.Y2555X	Nonsense	P	—	—	—	—
RP37	43	—	0.02	0.01	exon 26	c.4957dupA	p.S1653Kfs*2	Frameshift	P	exon 26	c.4957dupA	p.S1653Kfs*2	Frameshift	P	—	—	—	—
RP38	57	—	0.04	0.04	exon 26	c.4957dupA	p.S1653Kfs*2	Frameshift	P	exon 26	c.4957dupA	p.S1653Kfs*2	Frameshift	P	—	—	—	—
RP43	69	—	0.4	0.5	exon 26	c.4957dupA	p.S1653Kfs*2	Frameshift	P	exon 16	c.2528G>A	p.G843E	Missense	LP	—	—	—	—
RP44	47	—	LP	0.04	exon 26	c.4957dupA	p.S1653Kfs*2	Frameshift	P	exon 43	c.8805C>A	p.Y2935X	Nonsense	P	—	—	—	—
RP49	45	—	0.4	0.3	exon 16	c.2528G>A	p.G843E	Missense	LP	exon 16	c.2528G>A	p.G843E	Missense	LP	—	—	—	—
RP50	58	—	HM	HM	exon 37	c.7283C>A	p.S2428X	Nonsense	P	exon 16	c.2528G>A	p.G843E	Missense	LP	—	—	—	—
RP54	56	—	0.5	0.6	exon 10	c.1485_1493delinsCGAAAAG	p.V496Efs*13	Frameshift	P	exon 35	c.7028_7029delinsATCGT	p.L2343delinsHR	Non Frameshift	US	—	—	—	—
RP55	51	—	0.03	0.04	exon 26	c.4957dupA	p.S1653Kfs*2	Frameshift	P	exon 16	c.2528G>A	p.G843E	Missense	LP	—	—	—	—
RP57	52	—	0.1	HM	exon 26	c.4957dupA	p.S1653Kfs*2	Frameshift	P	exon 26	c.4957dupA	p.S1653Kfs*2	Frameshift	P	—	—	—	—
RP62	63	—	0.07	0.01	exon 26	c.4957dupA	p.S1653Kfs*2	Frameshift	P	exon 16	c.2528G>A	p.G843E	Missense	LP	—	—	—	—
RP63	35	—	0.03	0.06	exon 26	c.4957dupA	p.S1653Kfs*2	Frameshift	P	exon 26	c.4957dupA	p.S1653Kfs*2	Frameshift	P	—	—	—	—
1	43	—	1.18	—	exon 26	c.4957dupA	p.S1653Kfs*2	Frameshift	P	exon 11	c.1750G>T	p.E584X	Nonsense	P	—	—	—	—		Hirashima et al., 2017
2	69	—	0.2	—	exon 26	c.4957dupA	p.S1653Kfs*2	Frameshift	P	exon 43	c.8805C>A	p.Y2935X	Nonsense	P	—	—	—	—
3	71	—	1.18	—	exon 26	c.4957dupA	p.S1653Kfs*2	Frameshift	P	exon 43	c.8805C>A	p.Y2935X	Nonsense	P	—	—	—	—
4†	47	—	0.15	—	exon 26	c.4957dupA	p.S1653Kfs*2	Frameshift	P	exon 43	c.8805C>A	p.Y2935X	Nonsense	P	—	—	—	—
5†	51	—	0.9	—	exon 26	c.4957dupA	p.S1653Kfs*2	Frameshift	P	exon 43	c.8805C>A	p.Y2935X	Nonsense	P	—	—	—	—
6	66	—	0.8	—	exon 26	c.4957dupA	p.S1653Kfs*2	Frameshift	P	exon 43	c.8805C>A	p.Y2935X	Nonsense	P	—	—	—	—
7	31	—	1.54	—	exon 26	c.4957dupA	p.S1653Kfs*2	Frameshift	P	exon 43	c.8805C>A	p.Y2935X	Nonsense	P	—	—	—	—
8	59	—	1.54	—	exon 40	c.7793G>A	p.G2598D	Missense	US	exon 26	c.4957dupA	p.S1653Kfs*2	Frameshift	P	—	—	—	—
9	52	—	0.7	—	exon 43	c.8805C>A	p.Y2935X	Nonsense	P	exon 9	c.1345A>T	p.K449X	Nonsense	P	—	—	—	—
11	41	—	0.5	—	exon 26	c.4957dupA	p.S1653Kfs*2	Frameshift	P	exon 26	c.4957dupA	p.S1653Kfs*2	Frameshift	P	—	—	—	—
12	47	—	0.4	—	exon 41	c.7919G>A	p.W2640X	Nonsense	P	exon 41	c.7919G>A	p.W2640X	Nonsense	P	—	—	—	—
13†	66	—	0.09	—	exon 41	c.7919G>A	p.W2640X	Nonsense	P	exon 41	c.7919G>A	p.W2640X	Nonsense	P	—	—	—	—
14	44	—	1.18	—	exon 43	c.8805C>A	p.Y2935X	Nonsense	P	exon 43	c.8805C>A	p.Y2935X	Nonsense	P	—	—	—	—
15†	58	—	0.05	—	exon 43	c.8805C>A	p.Y2935X	Nonsense	P	exon 26	c.5014C>T	p.Q1672X	Nonsense	P	—	—	—	—
16	49	—	0.06	—	exon 26	c.4957dupA	p.S1653Kfs*2	Frameshift	P	exon 26	c.4957dupA	p.S1653Kfs*2	Frameshift	P	—	—	—	—
AII-1	63	8	0.005	0.005	exon 11	c.1644delG	p.Q548Qfs*60	Frameshift	P	exon 11	c.1644delG	p.Q548Qfs*60	Frameshift	P	—	—	—	—		Littink et al., 2010
BII-2	64	36	0.1	LP	exon 11	c.1673G>A	p.W558X	Nonsense	P	exon 18	c.2811C>A	p.C937X	Nonsense	P	—	—	—	—
CII-4	73	21	0.32	0.4	exon 26	c.4350_4356delTATAGCT	p.I1451Pfs*3	Frameshift	P	exon 43	c.8648_8655delCATGCAGA	p.T2883Kfs*4	Frameshift	P	—	—	—	—
DII-1	25	17	1	0.8	exon 26	c.4350_4356delTATAGCT	p.I1451Pfs*3	Frameshift	P	exon 26	c.4350_4356delTATAGCT	p.I1451Pfs*3	Frameshift	P	—	—	—	—
G	36	22	0.8	0.8	exon 26	c.4712C>G	p.S1571X	Nonsense	P	exon 32	c.6557G>A	p.G2186E	Missense	LP	—	—	—	—
H	26	13	0.63	0.5	exon 34	c.6794delC	p.P2265Qfs*46	Frameshift	P	exon 16	c.2500G>A	p.V834I	Missense	US	—	—	—	—
JII-1	42	22	0.8	0.8	exon 33	c.6714delT	p.I2239Sfs*17	Frameshift	P	exon 33	c.6714delT	p.I2239Sfs*17	Frameshift	P	—	—	—	—
KII-2	39	15	0.4	0.5	exon 34	c.6799_6800delCA	p.Q2267Efs*15	Frameshift	P	exon 34	c.6799_6800delCA	p.Q2267Efs*15	Frameshift	P	—	—	—	—
LII-2	66	35	0.2	0.2	exon 36	c.7095T>G	p.Y2365X	Nonsense	P	exon 43	c.8984T>A	p.I2995N	Missense	LP	—	—	—	—
MOL0318 III:5	19	—	0.7	0.7	exon 4	c.403_423delinsCTTTT	p.T135Lfs*25	Frameshift	P	exon 4	c.403_423delinsCTTTT	p.T135Lfs*25	Frameshift	P	—	—	—	—		Bandah-Rozenfeld et al., 2010
MOL0410 II:1	21	—	0.5	0.8	exon 26	c.4361_4362CC>AG	p.S1454X	Nonsense	P	exon 26	c.4361_4362CC>AG	p.S1454X	Nonsense	P	—	—	—	—
MOL0501 II:1	33	—	0.1	0.25	exon 4	c.403_423delinsCTTTT	p.T135Lfs*25	Frameshift	P	exon 4	c.403_423delinsCTTTT	p.T135Lfs*25	Frameshift	P	—	—	—	—
MOL0626 III:1	50	—	0.4	0.4	exon 4	c.403_423delinsCTTTT	p.T135Lfs*25	Frameshift	P	exon 8	c.1211dupA	p.N404Kfs*3	Frameshift	P	—	—	—	—
MOL0640 II:1	47	—	0.5	0.6	exon 43	c.8155_8156delCA	p.H2719Yfs*27	Frameshift	P	exon 43	c.8155_8156delCA	p.H2719Yfs*27	Frameshift	P	—	—	—	—
MOL0662 IV:1	41	—	0.15	0.15	exon 4	c.403_423delinsCTTTT	p.T135Lfs*25	Frameshift	P	exon 4	c.403_423delinsCTTTT	p.T135Lfs*25	Frameshift	P	—	—	—	—
MOL0792 II:2	57	—	FC	FC	exon 4	c.403_423delinsCTTTT	p.T135Lfs*25	Frameshift	P	exon 4	c.403_423delinsCTTTT	p.T135Lfs*25	Frameshift	P	—	—	—	—
MOL0806 III:7	—	—	—	—	exon 4	c.403_423delinsCTTTT	p.T135Lfs*25	Frameshift	P	exon 4	c.403_423delinsCTTTT	p.T135Lfs*25	Frameshift	P	—	—	—	—
TB24 III:2	55	—	0.5	0.4	exon 26	c.3715G>T	p.E1239X	Nonsense	P	exon 43	c.8155_8156delCA	p.H2719Yfs*27	Frameshift	P	—	—	—	—
TB59 III:1	19	—	0.8	0.8	exon 4	c.403_423delinsCTTTT	p.T135Lfs*25	Frameshift	P	exon 43	c.8155_8156delCA	p.H2719Yfs*27	Frameshift	P	—	—	—	—
RP-084	—	27	HM	HM	exon 26	c.4245G>T	p.Q1415H	Missense	US	exon 23	c.3489T>A	p.N1163K	Missense	US	—	—	—	—		Huang et al., 2017
RP-097	—	10	0.5	0.5	exon 31	c.6416G>A	p.C2139Y	Missense	LP	exon 31	c.6416G>A	p.C2139Y	Missense	LP	—	—	—	—
P1	12	12	1	1	exon 7	c.1155T>A	p.C385X	Nonsense	P	exon 43	c.8648_8655delCATGCAGA	p.T2883Kfs*4	Frameshift	P	—	—	—	—		McGuigan et al., 2017
P2	15	15	1	1	Intron 13	c.2137+1G>A	—	Splicing	P	Intron 13	c.2137+1G>A	—	Splicing	P	—	—	—	—
P3	18	18	0.8	0.8	exon 4	c.490C>T	p.R164X	Nonsense	P	exon 15-19	E-15_19 del	—	CNV	P	—	—	—	—
P4	19	19	1	1	exon 26	c.4829_4832delCATT	p.S1610Ffs*7	Frameshift	P	Intron 28	c.5928-2A>G	—	Splicing	P	—	—	—	—
P5	24	24	0.7	0.8	exon 41	c.7919G>A	p.W2640X	Nonsense	P	exon 43	c.8411_8412insTT	p.T2805X	Frameshift	P	—	—	—	—
P6	24	24	1	1	exon 4	c.32dupT	p.M12Dfs*14	Frameshift	P	exon 4	c.32dupT	p.M12Dfs*14	Frameshift	P	—	—	—	—
P7	32	32	0.4	0.3	exon 43	c.9286_9295delGTAAATATCG	p.V3096Lfs*28	Frameshift	P	exon 15-19	E-15_19 del	—	CNV	P	—	—	—	—
P8	33	33	0.7	0.4	exon 4	c.490C>T	p.R164X	Nonsense	P	exon 18	c.2826_2827delAT	p.V944Gfs*9	Frameshift	P	—	—	—	—
P9	34	34	1	0.8	exon 19	c.2889T>A	p.C963X	Nonsense	P	exon 19	c.2889T>A	p.C963X	Nonsense	P	—	—	—	—
P10	36	36	0.7	0.4	exon 12	E-12 del	—	CNV	P	exon 12	E-12 del	—	CNV	P	—	—	—	—
P11	38	38	0.4	0.3	Intron 14	c.2259+1G>A	—	Splicing	P	exon 43	c.8338_8342delinsTATAAACTATAACTATAAACTATAAACTATAAACTATAAACTATAAACTATAAACTATA	p.G2780_S2781delinsYKL*	Frameshift	P	—	—	—	—
P12	40	40	0.67	1	exon 32	c.6528C>A	p.Y2176X	Nonsense	P	exon 32	c.6528C>A	p.Y2176X	Nonsense	P	—	—	—	—
P13	48	48	0.67	0.8	exon 43	c.8408dupA	p.N2803Kfs*9	Frameshift	P	exon 27	c.5834delA	p.K1945Sfs*42	Frameshift	P	—	—	—	—
P14	47	47	HM	HM	exon 31	c.6416G>A	p.C2139Y	Missense	LP	exon 31	c.6416G>A	p.C2139Y	Missense	LP	—	—	—	—
P15	51	51	0.67	0.67	exon 43	c.9286_9295delGTAAATATCG	p.V3096Lfs*28	Frameshift	P	exon 43	c.9286_9295delGTAAATATCG	p.V3096Lfs*28	Frameshift	P	—	—	—	—
AII-1	61	12	0.2	0.5	exon 43	c.9405T>A	p.Y3135X	Nonsense	P	exon 43	c.9405T>A	p.Y3135X	Nonsense	P	—	—	—	—		Collin et al., 2008
BII-3	53	45	1	1	exon 43	c.9405T>A	p.Y3135X	Nonsense	P	exon 43	c.9405T>A	p.Y3135X	Nonsense	P	—	—	—	—
CII-1	48	13	0.4	0.5	exon 33	c.6714delT	p.I2239Sfs*17	Frameshift	P	exon 33	c.6714delT	p.I2239Sfs*17	Frameshift	P	—	—	—	—
1-II:2	63	—	—	—	exon 16	c.2528G>A	p.G843E	Missense	LP	exon 16	c.2528G>A	p.G843E	Missense	LP	—	—	—	—		Yang et al., 2020
2-III:2	43	30	0.9	1	exon 16	c.2528G>A	p.G843E	Missense	LP	exon 16	c.2528G>A	p.G843E	Missense	LP	—	—	—	—
3-II:2	58	—	1	1	exon 16	c.2528G>A	p.G843E	Missense	LP	exon 16	c.2528G>A	p.G843E	Missense	LP	—	—	—	—
4-III:3	76	—	—	—	exon 16	c.2528G>A	p.G843E	Missense	LP	exon 16	c.2528G>A	p.G843E	Missense	LP	—	—	—	—
5-II:2	24	22	1	1	exon 16	c.2528G>A	p.G843E	Missense	LP	exon 43	c.8805C>A	p.Y2935X	Nonsense	P	—	—	—	—
6-II:2	—	—	—	—	exon 16	c.2528G>A	p.G843E	Missense	LP	exon 26	c.4957dupA	p.S1653Kfs*2	Frameshift	P	—	—	—	—
7-II:1	45	—	—	—	exon 16	c.2528G>A	p.G843E	Missense	LP	Intron 26	c.5644+5G>A	—	Splicing	P	—	—	—	—
8-III:1	32	—	—	—	exon 16	c.2528G>A	p.G843E	Missense	LP	exon 32	c.6557G>A	p.G2186E	Missense	LP	—	—	—	—
9-V:1	33	—	—	—	exon 16	c.2528G>A	p.G843E	Missense	LP	exon 32	c.6557G>A	p.G2186E	Missense	LP	—	—	—	—
10-III:1	11	—	—	—	exon 16	c.2528G>A	p.G843E	Missense	LP	exon 26	c.3809T>G	p.V1270G	Missense	US	—	—	—	—
11-II:1	50	40	0.02	0.02	exon 16	c.2528G>A	p.G843E	Missense	LP	exon 37	c.7394C>G	p.T2465S	Missense	US	—	—	—	—
12-III:2	—	18	—	—	exon 16	c.2528G>A	p.G843E	Missense	LP	exon 4	c.632G>A	p.C211Y	Missense	LP	—	—	—	—
13-II:2	32	—	—	—	exon 37	c.7394C>G	p.T2465S	Missense	US	exon 37	c.7394C>G	p.T2465S	Missense	US	—	—	—	—
14-II:2	61	—	0.4	0.4	exon 37	c.7394C>G	p.T2465S	Missense	US	exon 37	c.7394C>G	p.T2465S	Missense	US	—	—	—	—
15-II:1	17	—	—	—	exon 37	c.7394C>G	p.T2465S	Missense	US	exon 26	c.4957dupA	p.S1653Kfs*2	Frameshift	P	—	—	—	—
16-II:1	52	10	0.5	0.5	exon 26	c.4957dupA	p.S1653Kfs*2	Frameshift	P	exon 26	c.4957dupA	p.S1653Kfs*2	Frameshift	P	—	—	—	—
17-II:2	23	15	1	1	exon 26	c.4957dupA	p.S1653Kfs*2	Frameshift	P	exon 26	c.4957dupA	p.S1653Kfs*2	Frameshift	P	—	—	—	—
18-IV:3	40	—	1.5	1.5	exon 26	c.4957dupA	p.S1653Kfs*2	Frameshift	P	exon 26	c.4957dupA	p.S1653Kfs*2	Frameshift	P	—	—	—	—
19-II:2	27	—	1	1	exon 26	c.4957dupA	p.S1653Kfs*2	Frameshift	P	exon 26	c.4957dupA	p.S1653Kfs*2	Frameshift	P	—	—	—	—
20-III:1	42	—	0.3	0.5	exon 26	c.4957dupA	p.S1653Kfs*2	Frameshift	P	exon 26	c.4957dupA	p.S1653Kfs*2	Frameshift	P	—	—	—	—
21-II:1	54	—	LP	HM	exon 26	c.4957dupA	p.S1653Kfs*2	Frameshift	P	exon 26	c.4957dupA	p.S1653Kfs*2	Frameshift	P	—	—	—	—
22-II:2	17	11	1	1	exon 26	c.4957dupA	p.S1653Kfs*2	Frameshift	P	exon 26	c.4957dupA	p.S1653Kfs*2	Frameshift	P	—	—	—	—
23-II:1	39	29	0.9	0.6	exon 26	c.4957dupA	p.S1653Kfs*2	Frameshift	P	exon 43	c.8805C>A	p.Y2935X	Nonsense	P	—	—	—	—
24-II:1	25	11	0.8	0.8	exon 26	c.4957dupA	p.S1653Kfs*2	Frameshift	P	exon 43	c.8805C>A	p.Y2935X	Nonsense	P	—	—	—	—
25-III:6	66	—	—	—	exon 43	c.8805C>A	p.Y2935X	Nonsense	P	exon 43	c.8805C>A	p.Y2935X	Nonsense	P	—	—	—	—
26-II:2	30	20	0.9	0.9	exon 43	c.8805C>A	p.Y2935X	Nonsense	P	exon 43	c.8805C>A	p.Y2935X	Nonsense	P	—	—	—	—
27-II:1	47	—	0.03	0.05	exon 43	c.8805C>A	p.Y2935X	Nonsense	P	exon 32	c.6557G>A	p.G2186E	Missense	LP	—	—	—	—
28-II:6	66	30	0.7	0.3	exon 43	c.8805C>A	p.Y2935X	Nonsense	P	exon 26	c.5027C>G	p.S1676X	Nonsense	P	—	—	—	—
29-II:2	60	—	0.2	0.4	exon 32	c.6563T>C	p.I2188T	Missense	LP	exon 32	c.6563T>C	p.I2188T	Missense	LP	—	—	—	—
30-II:3	40	19	0.8	0.9	exon 33	c.6714delT	p.I2239Sfs*17	Frameshift	P	exon 35	c.7002C>A	p.C2344X	Nonsense	P	—	—	—	—
ARRP-49	50	32	—	—	exon 43	c.8422G>A	p.A2808T	Missense	US	exon 40	c.7868G>A	p.G2623E	Missense	LP	—	—	—	—		Di et al., 2016
RP:S-2	8	1	—	—	exon 43	c.8455delA	p.T2819Qfs*11	Frameshift	P	exon 43	c.8455delA	p.T2819Qfs*11	Frameshift	P	—	—	—	—
RP:S-10	55	40	—	—	exon 26	c.4606C>G	p.Q1536E	Missense	LP	exon 26	c.5038A>G	p.N1680D	Missense	LP	—	—	—	—
RP:S-14	14	—	—	—	exon 43	c.9059T>C	p.I3020T	Missense	US	exon 43	c.9059T>C	p.I3020T	Missense	US	—	—	—	—
RP:S-18	55	52	—	—	exon 9	c.1418G>T	p.G473V	Missense	US	exon 19	c.2971C>T	p.L991F	Missense	LP	—	—	—	—
RP:S-22	38	13	—	—	exon 43	c.8388C>A	p.Y2796X	Nonsense	P	exon 43	c.8388C>A	p.Y2796X	Nonsense	P	—	—	—	—
RP:S-34	44	14	—	—	exon 36	c.7187G>A	p.C2396S	Missense	US	exon 36	c.7187G>A	p.C2396S	Missense	US	—	—	—	—
RP:S-40	25	13	—	—	Intron 14	c.2259+1G>A	—	Splicing	P	Intron 14	c.2259+1G>A	—	Splicing	P	—	—	—	—
RP:S-48	20	15	—	—	exon 20	c.3024C>A	p.C1008X	Nonsense	P	exon 20	c.3024C>A	p.C1008X	Nonsense	P	—	—	—	—
F9 IV:2	38	22	0.1	0.1	Intron 28	c.5928-2A>G	—	Splicing	P	Intron 28	c.5928-2A>G	—	Splicing	P	—	—	—	—		Habibi et al., 2016
RP50 IV:4	42	14	0.05	0.05	exon 43	c.8236G>C	p.D2746H	Missense	US	exon 43	c.8236G>C	p.D2746H	Missense	US	—	—	—	—		Khan et al., 2010
W09–0046 IV:3	48	17	0.05	0.05	exon 43	c.9019G>T	p.D3007Y	Missense	LP	exon 43	c.9019G>T	p.D3007Y	Missense	LP	—	—	—	—
P15	60	45	0.6	0.6	5‘UTR	c.-459C>T	—	Splicing	US	exon 43	c.9299_9302delCTCA	p.T3100Kfs*26	Frameshift	P	—	—	—	—		Pierrottet et al., 2014
RP195	—	—	0.2	0.2	exon 6	c.904C>T	p.L302F	Missense	US	exon 31	c.6416G>A	p.C2139Y	Missense	LP	—	—	—	—		Xu et al., 2014
RP303	43	43	0.8	0.7	exon 8	c.1211dupA	p.N404Kfs*3	Frameshift	P	exon 31	c.6416G>A	p.C2139Y	Missense	LP	—	—	—	—
RP151	30	13	0.3	0.4	exon 37	c.7376dupA	p.N2459Kfs*2	Frameshift	P	exon 37	c.7376dupA	p.N2459Kfs*2	Frameshift	P	—	—	—	—
439	57	15	—	—	exon 11	c.1750G>T	p.E584X	Nonsense	P	exon 26	c.4957dupA	p.S1653Kfs*2	Frameshift	P	—	—	—	—		Yoon et al., 2015
440	37	30	—	—	exon 32	c.6557G>A	p.G2186E	Missense	LP	exon 26	c.4957dupA	p.S1653Kfs*2	Frameshift	P	—	—	—	—
10	45	8	0.1	0.05	exon 41	c.8012T>A	p.L2671X	Nonsense	P	exon 31	c.6416G>A	p.C2139Y	Missense	LP	—	—	—	—		Sun et al., 2020b
12	72	7	HM	HM	exon 18	c.2756G>A	p.G919E	Missense	US	exon 31	c.6410G>A	p.R2137H	Missense	US	—	—	—	—
P1:IV6	63	—	LP	HM	exon 14-22	E-14_22 del	—	CNV	P	exon 14-22	E-14_22 del	—	CNV	P	—	—	—	—		Wormser et al., 2018
IV8	51	30	0.1	0.05	exon 26	c.5450G>A	p.W1817X	Nonsense	P	exon 14-22	E-14_22 del	—	CNV	P	—	—	—	—
P1:IV13	57	25	LP	LP	exon 14-22	E-14_22 del	—	CNV	P	exon 14-22	E-14_22 del	—	CNV	P	—	—	—	—
P2:III4	38	15	0.5	0.4	exon 26	c.5450G>A	p.W1817X	Nonsense	P	exon 26	c.5450G>A	p.W1817X	Nonsense	P	—	—	—	—
7	54	19	0.2	0.5	exon 43	c.8545C>T	p.R2849X	Nonsense	P	Intron 26	c.5644+5G>A	—	Splicing	P	—	—	—	—		Dan et al., 2020
62	64	45	FC	0.12	exon 19	c.2953_2961del	p.T985_G987del	Non Frameshift	US	exon 43	c.8805C>A	p.Y2935X	Nonsense	P	—	—	—	—
112	36	30	0.1	0.12	exon 26	c.4955C>G	p.S1652X	Nonsense	P	exon 32	c.6557G>A	p.G2186E	Missense	LP	—	—	—	—
135	9	8	0.6	0.15	exon 43	c.9209T>C	p.I3070T	Missense	US	exon 23	c.3489T>A	p.N1163K	Missense	US	—	—	—	—
RP214	—	—	—	—	exon 17	c.2710_2726delGACTGTGAAGATATGGT	p.D904Qfs*17	Frameshift	P	exon 17	c.2710_2726delGACTGTGAAGATATGGT	p.D904Qfs*17	Frameshift	P	—	—	—	—		Abd El-Aziz et al., 2008
RP5	—	—	—	—	exon 15-19	E-15_19 del	—	CNV	P	exon 15-19	E-15_19 del	—	CNV	P	—	—	—	—
RP328	—	—	—	—	exon 12	c.1971delT	p.T657Tfs*5	Frameshift	P	exon 12	c.1971delT	p.T657Tfs*5	Frameshift	P	—	—	—	—
RP73	—	—	—	—	exon 12	E-12 del	—	CNV	P	exon 28	c.5857G>T	p.E1953X	Nonsense	P	—	—	—	—
RP349	—	—	—	—	exon 41	c.7919G>A	p.W2640X	Nonsense	P	exon 41	c.7919G>A	p.W2640X	Nonsense	P	—	—	—	—
arPR-F027	—	—	—	—	exon 4	c.32dupT	p.M12Dfs*14	Frameshift	P	exon 4	c.32dupT	p.M12Dfs*14	Frameshift	P	—	—	—	—		Abu-Safieh et al., 2013
arRP-F098	—	—	—	—	exon 29	c.6050G>T	p.G2017V	Missense	US	exon 29	c.6050G>T	p.G2017V	Missense	US	—	—	—	—
sRP-007	—	—	—	—	exon 29	c.6050G>T	p.G2017V	Missense	US	exon 29	c.6050G>T	p.G2017V	Missense	US	—	—	—	—
CIC000128, F100	—	—	—	—	exon 4	c.408_423delTAATTCTAAGTGGCTG	p.N137Vfs*24	Frameshift	P	exon 4	c.408_423delTAATTCTAAGTGGCTG	p.N137Vfs*24	Frameshift	P	—	—	—	—		Audo et al., 2012
CIC0000943, F100	—	—	—	—	exon 4	c.408_423delTAATTCTAAGTGGCTG	p.N137Vfs*24	Frameshift	P	exon 4	c.408_423delTAATTCTAAGTGGCTG	p.N137Vfs*24	Frameshift	P	—	—	—	—
CIC000203, F100	—	—	—	—	exon 4	c.408_423delTAATTCTAAGTGGCTG	p.N137Vfs*24	Frameshift	P	exon 4	c.408_423delTAATTCTAAGTGGCTG	p.N137Vfs*24	Frameshift	P	—	—	—	—
CIC0003744, F100	—	—	—	—	exon 4	c.408_423delTAATTCTAAGTGGCTG	p.N137Vfs*24	Frameshift	P	exon 4	c.408_423delTAATTCTAAGTGGCTG	p.N137Vfs*24	Frameshift	P	—	—	—	—
CIC000181, F100	—	—	—	—	exon 4	c.408_423delTAATTCTAAGTGGCTG	p.N137Vfs*24	Frameshift	P	exon 4	c.408_423delTAATTCTAAGTGGCTG	p.N137Vfs*24	Frameshift	P	—	—	—	—
CIC0001808, F100	—	—	—	—	exon 4	c.408_423delTAATTCTAAGTGGCTG	p.N137Vfs*24	Frameshift	P	exon 4	c.408_423delTAATTCTAAGTGGCTG	p.N137Vfs*24	Frameshift	P	—	—	—	—
1	—	—	—	—	exon 32	c.6563T>C	p.I2188T	Missense	LP	exon 43	c.8805C>A	p.Y2935X	Nonsense	P	—	—	—	—		Arai et al., 2015
2	—	—	—	—	exon 26	c.4957dupA	p.S1653Kfs*2	Frameshift	P	exon 32	c.6557G>A	p.G2186E	Missense	LP	—	—	—	—
3	—	—	—	—	exon 26	c.4957dupA	p.S1653Kfs*2	Frameshift	P	exon 32	c.6563T>C	p.I2188T	Missense	LP	—	—	—	—
4	—	—	—	—	exon 32	c.6557G>A	p.G2186E	Missense	LP	exon 16	c.2522dupA	p.Y841X	Nonsense	P	—	—	—	—
5	—	—	—	—	exon 15	c.2380C>T	p.R794X	Nonsense	P	exon 26	c.4957dupA	p.S1653Kfs*2	Frameshift	P	—	—	—	—
6	—	—	—	—	exon 26	c.4957dupA	p.S1653Kfs*2	Frameshift	P	exon 43	c.8805C>A	p.Y2935X	Nonsense	P	—	—	—	—
7	—	—	—	—	exon 26	c.4957dupA	p.S1653Kfs*2	Frameshift	P	Intron 38	c.7412-1G>T	—	Splicing	P	—	—	—	—
8	—	—	—	—	exon 26	c.4957dupA	p.S1653Kfs*2	Frameshift	P	exon 43	c.8805C>A	p.Y2935X	Nonsense	P	—	—	—	—
9	—	—	—	—	exon 26	c.4957dupA	p.S1653Kfs*2	Frameshift	P	exon 43	c.8805C>A	p.Y2935X	Nonsense	P	—	—	—	—
10	—	—	—	—	exon 32	c.6557G>A	p.G2186E	Missense	LP	exon 43	c.8805C>A	p.Y2935X	Nonsense	P	—	—	—	—
11	—	—	—	—	exon 32	c.6563T>C	p.I2188T	Missense	LP	exon 43	c.8805C>A	p.Y2935X	Nonsense	P	—	—	—	—
12	—	—	—	—	exon 26	c.4957dupA	p.S1653Kfs*2	Frameshift	P	exon 43	c.8288T>G	p.L2763R	Missense	US	—	—	—	—
13	—	—	—	—	exon 26	c.5202_5203delGT	p.F1735Qfs*6	Frameshift	P	exon 43	c.8379_8380insTGCA	p. E2794Cfs*19	Frameshift	P	—	—	—	—
14	—	—	—	—	exon 26	c.5202_5203delGT	p.F1735Qfs*6	Frameshift	P	exon 43	c.8379_8380insTGCA	p. E2794Cfs*19	Frameshift	P	—	—	—	—
15	—	—	—	—	exon 26	c.4957dupA	p.S1653Kfs*2	Frameshift	P	exon 32	c.6563T>C	p.I2188T	Missense	LP	—	—	—	—
16	—	—	—	—	exon 26	c.4957dupA	p.S1653Kfs*2	Frameshift	P	exon 32	c.6563T>C	p.I2188T	Missense	LP	—	—	—	—
17	—	—	—	—	exon 26	c.4957dupA	p.S1653Kfs*2	Frameshift	P	exon 43	c.8805C>A	p.Y2935X	Nonsense	P	—	—	—	—
18	—	—	—	—	exon 4	c.228G>C	p.Q76H	Missense	LP	exon 16	c.2522dupA	p.Y841X	Nonsense	P	—	—	—	—
19	—	—	—	—	exon 26	c.4957dupA	p.S1653Kfs*2	Frameshift	P	exon 43	c.8805C>A	p.Y2935X	Nonsense	P	—	—	—	—
20	—	—	—	—	exon 26	c.4957dupA	p.S1653Kfs*2	Frameshift	P	exon 43	c.8805C>A	p.Y2935X	Nonsense	P	—	—	—	—
21	—	—	—	—	exon 26	c.4957dupA	p.S1653Kfs*2	Frameshift	P	exon 41	c.8048C>T	p.T2683I	Missense	US	—	—	—	—
22	—	—	—	—	exon 26	c.4957dupA	p.S1653Kfs*2	Frameshift	P	exon 43	c.8805C>A	p.Y2935X	Nonsense	P	—	—	—	—
23	—	—	—	—	Intron 27	c.5645-2A>G	—	Splicing	P	exon 43	c.8236G>C	p.D2746H	Missense	US	—	—	—	—
24	—	—	—	—	exon 13	c.2101G>T	p.G701C	Missense	US	exon 26	c.4557delA	p.A1520Pfs*30	Frameshift	P	—	—	—	—
25	—	—	—	—	Intron 27	c.5645-3_4insT	—	Splicing	US	exon 4	c.35T>C	p.M12T	Missense	LP	—	—	—	—
26	—	—	—	—	exon 35	c.6869_6896delC	p.P2290Qfs*12	Frameshift	P	exon 26	c.4957dupA	p.S1653Kfs*2	Frameshift	P	—	—	—	—
27	—	—	—	—	exon 32	c.6563T>C	p.I2188T	Missense	LP	exon 35	c.6897_6902dupAGGTCC	p.G2300_P2301dup	Non Frameshift	US	—	—	—	—
28	—	—	—	—	exon 32	c.6557G>A	p.G2186E	Missense	LP	exon 35	c.6976C>T	p.R2326X	Nonsense	P	—	—	—	—
29	—	—	—	—	exon 4	c.141A>T	p.E47D	Missense	US	exon 26	c.4957dupA	p.S1653Kfs*2	Frameshift	P	—	—	—	—
30	—	—	—	—	exon 26	c.4957dupA	p.S1653Kfs*2	Frameshift	P	exon 32	c.6557G>A	p.G2186E	Missense	LP	—	—	—	—
31	—	—	—	—	exon 26	c.4957dupA	p.S1653Kfs*2	Frameshift	P	exon 43	c.8288T>G	p.L2763R	Missense	US	—	—	—	—
RP1052M II-1	—	—	—	—	exon 9-10	E-9_10 del	—	CNV	P	exon 43	c.9178_9181delATAA	p.N3061Tfs*3	Frameshift	P	—	—	—	—		Barragán et al., 2010
RP1237M II-1	—	—	—	—	exon 14	c.2234A>G	p.N745S	Missense	LP	exon 41	c.7919G>A	p.W2640X	Nonsense	P	—	—	—	—
RP84B II-3	—	—	—	—	exon 29	c.6050G>T	p.G2017V	Missense	US	exon 29	c.6050G>T	p.G2017V	Missense	US	—	—	—	—
RP136B II-1	—	—	—	—	exon 43	c.8834G>A	p.G2945E	Missense	US	exon 33	c.6632C>T	p.S2211L	Missense	US	—	—	—	—
RP367B II-1	—	—	—	—	exon 26	c.4120C>T	p.R1374X	Nonsense	P	Intron 31	c.6424+1G>T	—	Splicing	P	—	—	—	—
RP228B II-2	—	—	—	—	5‘UTR	c.-462G>C	—	Splicing	US	5‘UTR	c.-462G>C	—	Splicing	US	—	—	—	—
RP155B IV-2	—	—	—	—	exon 33	c.6714delT	p.I2239Sfs*17	Frameshift	P	exon 33	c.6714delT	p.I2239Sfs*17	Frameshift	P	—	—	—	—
RP194B II-1	—	—	—	—	exon 43	c.9405T>A	p.Y3135X	Nonsense	P	exon 43	c.9405T>A	p.Y3135X	Nonsense	P	—	—	—	—
family1 II-4	—	—	—	—	Intron 14	c.2259+1G>A	—	Splicing	P	exon 16	c.2620C>T	p.Q874X	Nonsense	P	—	—	—	—		Bonilha et al., 2015
family2 II-1	—	—	—	—	exon 26	c.4350_4356delTATAGCT	p.I1451Pfs*3	Frameshift	P	exon 15-18	E-15_18 del	—	CNV	P	—	—	—	—
OGI-323-766	—	—	—	—	Intron 35	c.7055+1G>T	—	Splicing	P	Intron 35	c.7055+1G>T	—	Splicing	P	—	—	—	—		Consugar et al., 2015
OGI-555-1134	—	—	—	—	exon 34	c.6794delC	p.P2265Qfs*46	Frameshift	P	exon 26	c.5330T>A	p.L1777X	Nonsense	P	—	—	—	—
8	52	—	—	—	exon 4	c.604T>C	p.C202R	Missense	LP	exon 26	c.4350_4356delTATAGCT	p.I1451Pfs*3	Frameshift	P	—	—	—	—		Eisenberger et al., 2013
88	48	—	—	—	exon 4	c.67delA	p.T23Hfs*19	Frameshift	P	exon 4	c.162C>A	p.Y54X	Nonsense	P	—	—	—	—
93	23	—	—	—	exon 26	c.4350_4356delTATAGCT	p.I1451Pfs*3	Frameshift	P	5‘UTR	c.-448+5G>A	—	Splicing	P	—	—	—	—
VGM+V.35	—	—	—	—	exon 43	c.8984T>A	p.I2995N	Missense	LP	exon 36	c.7095T>G	p.Y2365X	Nonsense	P	—	—	—	—		Ge et al., 2015
U6H+2.34	—	—	—	—	exon 29	c.6078G>T	p.Q2026H	Missense	LP	exon 31	c.6416G>A	p.C2139Y	Missense	LP	—	—	—	—
TW+H.97	—	—	—	—	exon 26	c.4350_4356delTATAGCT	p.I1451Pfs*3	Frameshift	P	exon 33	c.6714delT	p.I2239Sfs*17	Frameshift	P	—	—	—	—
3U6+9.42	—	—	—	—	exon 6	c.904C>T	p.L302F	Missense	US	exon 43	c.8860T>C	p.F2954L	Missense	LP	—	—	—	—
VNM+T.47	—	—	—	—	exon 26	c.4402G>C	p.D1468H	Missense	US	Intron 22	c.3443+1G>T	—	Splicing	P	—	—	—	—
1066	—	—	—	—	exon 26	c.4936G>T	p.E1646X	Nonsense	P	exon 31	c.6250C>T	p.Q2084X	Nonsense	P	—	—	—	—		Glöckle et al., 2014
182	—	—	—	—	exon 33	c.6714delT	p.I2239Sfs*17	Frameshift	P	exon 33	c.6714delT	p.I2239Sfs*17	Frameshift	P	—	—	—	—
257	—	—	—	—	exon 4	c.32dupT	p.M12Dfs*14	Frameshift	P	Intron 32	c.6571+1G>A	—	Splicing	P	—	—	—	—
793	—	—	—	—	exon 14	c.2194C>T	p.Q732X	Nonsense	P	exon 14	c.2194C>T	p.Q732X	Nonsense	P	—	—	—	—
796	—	—	—	—	exon 26	c.4350_4356delTATAGCT	p.I1451Pfs*3	Frameshift	P	exon 43	c.8288T>G	p.L2763R	Frameshift	US	—	—	—	—
994	—	—	—	—	exon 6	c.932dupA	p.N311Kfs*1	Frameshift	P	exon 26	c.4045C>T	p.R1349X	Nonsense	P	—	—	—	—
1058	—	—	—	—	exon 22	c.3317delC	p.P1106Hfs*67	Frameshift	P	exon 22	c.3317delC	p.P1106Hfs*67	Frameshift	P	—	—	—	—
1283	—	—	—	—	exon 26	c.4350_4356delTATAGCT	p.I1451Pfs*3	Frameshift	P	exon 26	c.4350_4356delTATAGCT	p.I1451Pfs*3	Frameshift	P	—	—	—	—
RP 234	—	—	—	—	exon 25	c.3695T>C	p.I1232T	Missense	US	exon 12	E-12 del	—	CNV	P	—	—	—	—		González-del Pozo et al., 2011
V:3	—	—	—	—	exon 6	c.910dupT	p.W304Lfs*9	Frameshift	P	exon 6	c.910dupT	p.W304Lfs*9	Frameshift	P	—	—	—	—		Hashmi et al., 2018
RP3H II-5	—	—	—	—	exon 26	c.4957dupA	p.S1653Kfs*2	Frameshift	P	exon 26	c.4957dupA	p.S1653Kfs*2	Frameshift	P	—	—	—	—		Hosono et al., 2012
RP48K II-1	—	—	—	—	exon 26	c.4957dupA	p.S1653Kfs*2	Frameshift	P	exon 26	c.4957dupA	p.S1653Kfs*2	Frameshift	P	—	—	—	—
RP54	—	—	—	—	exon 26	c.4957dupA	p.S1653Kfs*2	Frameshift	P	exon 26	c.4957dupA	p.S1653Kfs*2	Frameshift	P	—	—	—	—
RP44K	—	—	—	—	exon 26	c.4957dupA	p.S1653Kfs*2	Frameshift	P	exon 32	c.6557G>A	p.G2186E	Missense	LP	—	—	—	—
RP56K II-1	—	—	—	—	exon 26	c.4957dupA	p.S1653Kfs*2	Frameshift	P	exon 43	c.8288T>G	p.L2763R	Missense	US	—	—	—	—
RP87N	—	—	—	—	exon 26	c.4957dupA	p.S1653Kfs*2	Frameshift	P	exon 40	c.7793G>A	p.G2598D	Missense	US	—	—	—	—
RP81K II-5	—	—	—	—	exon 16	c.2522dupA	p.Y841X	Nonsense	P	exon 32	c.6557G>A	p.G2186E	Missense	LP	—	—	—	—
RP21H	—	—	—	—	exon 32	E-32 del	—	CNV	P	exon 32	E-32 del	—	CNV	P	—	—	—	—
RP35K	—	—	—	—	exon 43	c.8805C>A	p.Y2935X	Nonsense	P	exon 43	c.8805C>A	p.Y2935X	Nonsense	P	—	—	—	—
C II.1	20	—	—	—	exon 15-26	E-15_26 del	—	CNV	P	exon 15-26	E-15_26 del	—	CNV	P	—	—	—	—		Kastner et al., 2015
JU#0659 II:2	31	—	—	—	exon 43	c.8805C>A	p.Y2935X	Nonsense	P	exon 26	c.4957dupA	p.S1653Kfs*2	Frameshift	P	—	—	—	—		Katagiri et al., 2014
7	—	—	—	—	exon 4	c.490C>T	p.R164X	Nonsense	P	exon 21	c.3226T>C	p.C1076R	Missense	LP	—	—	—	—		O'Sullivan et al., 2012
42	—	—	—	—	exon 36	c.7095T>G	p.Y2365X	Nonsense	P	exon 43	c.9277_9278dupGG	p.R3094Vfs*4	Frameshift	P	—	—	—	—
RP-1706	—	—	—	—	exon 18	c.2826_2827delAT	p.V944Gfs*9	Frameshift	P	exon 19	E-19 del	—	CNV	P	—	—	—	—		Perez-Carro et al., 2016
RP-1929	—	—	—	—	exon 43	c.9079_9080insA	p.R3027Kfs*9	Frameshift	P	exon 13-14	E-13_14 del	—	CNV	P	—	—	—	—
F228	—	—	—	—	exon 3-4	E-3_4 del	—	CNV	P	exon 20	c.3003T>A	p.C1001X	Nonsense	P	—	—	—	—		Pieras et al., 2011
RP1	—	—	—	—	exon 3-4	E-3_4 dup	—	CNV	P	exon 43	c.8834G>A	p.G2945E	Missense	US	—	—	—	—
F618 CIC01001	—	—	—	—	exon 4	c.547delT	p.C183Afs*74	Frameshift	P	exon 9	E-9 del	—	CNV	P	—	—	—	—
RP73	—	—	—	—	exon 12	E-12 del	—	CNV	P	exon 28	c.5857G>T	p.E1953X	Nonsense	P	—	—	—	—
F735	—	—	—	—	exon 12	E-12 del	—	CNV	P	exon 12	E-12 del	—	CNV	P	—	—	—	—
RP3 03/2522b	—	—	—	—	exon 13-14	E-13_14 del	—	CNV	P	exon 13-14	E-13_14 del	—	CNV	P	—	—	—	—
RP5	—	—	—	—	exon 15-19	E-15_19 del	—	CNV	P	exon 15-19	E-15_19 del	—	CNV	P	—	—	—	—
F360 CIC00529	—	—	—	—	exon 26	c.4827_4830delTTCA	p.S1610Ffs*7	Frameshift	P	exon 33	E-33 del	—	CNV	P	—	—	—	—
F115	—	—	—	—	exon 32-33	E-32_33 del	—	CNV	P	exon 32-33	E-32_33 del	—	CNV	P	—	—	—	—
R9	—	—	—	—	exon 26	c.5168dupT	p.L1723Ffs*7	Frameshift	P	exon 23-29	E-23_29 dup	—	CNV	P	—	—	—	—		Nishiguchi et al., 2013
R9's sister	—	—	—	—	exon 26	c.5168dupT	p.L1723Ffs*7	Frameshift	P	exon 23-29	E-23_29 dup	—	CNV	P	—	—	—	—
31910	—	—	—	—	exon 15	c.2309A>C	p.Q770P	Missense	US	exon 15	c.2309A>C	p.Q770P	Missense	US	—	—	—	—		Neveling et al., 2012
21	51	—	—	—	exon 15-18	E-15_18 del	—	CNV	P	exon 20-22	E-20_22 del	—	CNV	P	—	—	—	—		Cho et al., 2020
13	—	—	—	—	exon 7	c.1155T>A	p.C385X	Nonsense	P	exon 43	c.8648_8655delCATGCAGA	p.T2883Kfs*4	Frameshift	P	—	—	—	—		Avela et al., 2018
14	—	—	—	—	exon 7	c.1155T>A	p.C385X	Nonsense	P	exon 43	c.8648_8655delCATGCAGA	p.T2883Kfs*4	Frameshift	P	—	—	—	—
15	—	—	—	—	exon 7	c.1155T>A	p.C385X	Nonsense	P	exon 43	c.8648_8655delCATGCAGA	p.T2883Kfs*4	Frameshift	P	—	—	—	—
32	—	—	—	—	exon 7	c.1155T>A	p.C385X	Nonsense	P	exon 43	c.8648_8655delCATGCAGA	p.T2883Kfs*4	Frameshift	P	—	—	—	—
107	—	—	—	—	exon 33	c.6714delT	p.I2239Sfs*17	Frameshift	P	exon 26	c.4829_4832delCATT	p.S1610Ffs*7	Frameshift	P	—	—	—	—		Jespersgaard et al., 2019
108	—	—	—	—	exon 43	c.8779T>C	p.C2927R	Missense	LP	exon 4	c.232delT	p.C78Afs*7	Frameshift	P	—	—	—	—
109	—	—	—	—	exon 4	c.232delT	p.C78Afs*7	Frameshift	P	exon 4	c.232delT	p.C78Afs*7	Frameshift	P	—	—	—	—
110	—	—	—	—	exon 33	c.6714delT	p.I2239Sfs*17	Frameshift	P	exon 33	c.6714delT	p.I2239Sfs*17	Frameshift	P	—	—	—	—
111	—	—	—	—	exon 33	c.6714delT	p.I2239Sfs*17	Frameshift	P	exon 43	c.9344T>A	p.V3115D	Missense	US	—	—	—	—
112	—	—	—	—	exon 4	c.232delT	p.C78Afs*7	Frameshift	P	exon 4	c.232delT	p.C78Afs*7	Frameshift	P	—	—	—	—
113	—	—	—	—	exon 43	c.9317_9336delCCAATTTTGTTGGCAAAATT	p.T3106Kfs*13	Frameshift	P	exon 4	c.232delT	p.C78Afs*7	Frameshift	P	—	—	—	—
114	—	—	—	—	Intron 38	c.7412-1G>C	—	Splicing	P	Intron 12	c.2023+5G>T	—	Splicing	US	—	—	—	—
115	—	—	—	—	exon 33	c.6714delT	p.I2239Sfs*17	Frameshift	P	exon 8	c.1211dupA	p.N404Kfs*3	Frameshift	P	—	—	—	—
116	—	—	—	—	exon 26	c.4957dupA	p.S1653Kfs*2	Frameshift	P	exon 16	c.2528G>A	p.G843E	Missense	LP	—	—	—	—
117	—	—	—	—	exon 41	c.8054G>A	p.G2685E	Missense	LP	exon 43	c.8648_8655delCATGCAGA	p.T2883Kfs*4	Frameshift	P	—	—	—	—
118	—	—	—	—	exon 26	c.4350_4356delTATAGCT	p.I1451Pfs*3	Frameshift	P	exon 4	c.232delT	p.C78Afs*7	Frameshift	P	—	—	—	—
119	—	—	—	—	exon 4	c.232delT	p.C78Afs*7	Frameshift	P	exon 4	c.232delT	p.C78Afs*7	Frameshift	P	—	—	—	—
120	—	—	—	—	exon 6	c.873T>A	p.C291X	Nonsense	P	exon 26	c.4957dupA	p.S1653Kfs*2	Frameshift	P	—	—	—	—
121	—	—	—	—	exon 13-22	E-13_22 del	—	CNV	P	exon 13-22	E-13_22 del	—	CNV	P	—	—	—	—
122	—	—	—	—	exon 30	E-30 dup	—	CNV	P	exon 30	E-30 dup	—	CNV	P	—	—	—	—
123	—	—	—	—	exon 4	c.350delA	p.N117Ifs*14	Frameshift	P	exon 26	c.4350_4356delTATAGCT	p.I1451Pfs*3	Frameshift	P	—	—	—	—
124	—	—	—	—	exon 33	c.6714delT	p.I2239Sfs*17	Frameshift	P	exon 33	c.6714delT	p.I2239Sfs*17	Frameshift	P	—	—	—	—
125	—	—	—	—	exon 43	c.8648_8655delCATGCAGA	p.T2883Kfs*4	Frameshift	P	exon 33	c.6714delT	p.I2239Sfs*17	Frameshift	P	—	—	—	—
126	—	—	—	—	exon 33	c.6714delT	p.I2239Sfs*17	Frameshift	P	exon 14	E-14 dup	—	CNV	P	—	—	—	—
127	—	—	—	—	exon 26	c.4350_4356delTATAGCT	p.I1451Pfs*3	Frameshift	P	exon 33	c.6714delT	p.I2239Sfs*17	Frameshift	P	—	—	—	—
128	—	—	—	—	exon 4	c.232delT	p.C78Afs*7	Frameshift	P	exon 33	c.6591_6594delAAAG	p.K2198Sfs*25	Frameshift	P	—	—	—	—
129	—	—	—	—	exon 33	c.6714delT	p.I2239Sfs*17	Frameshift	P	exon 17-18	E-17_18 del	—	CNV	P	—	—	—	—
130	—	—	—	—	exon 4	c.232delT	p.C78Afs*7	Frameshift	P	exon 33	c.6714delT	p.I2239Sfs*17	Frameshift	P	—	—	—	—
131	—	—	—	—	exon 4	c.232delT	p.C78Afs*7	Frameshift	P	exon 33	c.6591_6594delAAAG	p.K2198Sfs*25	Frameshift	P	—	—	—	—
132	—	—	—	—	exon 33	c.6714delT	p.I2239Sfs*17	Frameshift	P	exon 33	c.6714delT	p.I2239Sfs*17	Frameshift	P	—	—	—	—
133	—	—	—	—	exon 43	c.8648_8655delCATGCAGA	p.T2883Kfs*4	Frameshift	P	exon 33	c.6714delT	p.I2239Sfs*17	Frameshift	P	—	—	—	—
134	—	—	—	—	exon 4	c.232delT	p.C78Afs*7	Frameshift	P	exon 33	c.6714delT	p.I2239Sfs*17	Frameshift	P	—	—	—	—
135	—	—	—	—	Intron 12	c.2023+5G>T	—	Splicing	US	Intron 13	c.2137+1G>A	—	Splicing	P	—	—	—	—
1	—	—	—	—	exon 32	c.6544_6547delAACA	p.N2182Vfs*2	Frameshift	P	exon 32	c.6544_6547delAACA	p.N2182Vfs*2	Frameshift	P	—	—	—	—		Birtel et al., 2018
2	—	—	—	—	exon 26	c.4462_4469dupAGCCCCTC	p.M1491Afs*12	Frameshift	P	exon 26	c.4597_4613delTCAAGCAACCAGAGACT	p.S1533Hfs*9	Frameshift	P	—	—	—	—
3	—	—	—	—	exon 33	c.6714delT	p.I2239Sfs*17	Frameshift	P	exon 40	c.7810C>T	p.R2604C	Missense	LP	—	—	—	—
5	—	—	—	—	exon 26	c.4350_4356delTATAGCT	p.I1451Pfs*3	Frameshift	P	exon 43	c.8598delA	p.G2867Vfs*5	Frameshift	P	—	—	—	—
6	—	—	—	—	exon 28	c.5927G>T	p.R1976M	Missense	LP	exon 28	c.5927G>T	p.R1976M	Missense	LP	—	—	—	—
7	—	—	—	—	Intron 8	c.1299+3A>C	—	Splicing	LP	Intron 8	c.1299+3A>C	—	Splicing	LP	—	—	—	—
8	—	—	—	—	exon 43	c.8648_8655delCATGCAGA	p.T2883Kfs*4	Frameshift	P	exon 29	E-29 dup	—	CNV	P	—	—	—	—
9	—	—	—	—	exon 43	c.8793_8796delATCA	p.Q2931Hfs*43	Frameshift	P	exon 29	E-29 dup	—	CNV	P	—	—	—	—
10	—	—	—	—	exon 34	E-34 del	—	CNV	P	exon 34	E-34 del	—	CNV	P	—	—	—	—
38	—	—	—	—	exon 23	c.3567delA	p.G1190Dfs*39	Frameshift	P	exon 26	c.4829_4832delCATT	p.S1610Ffs*7	Frameshift	P	—	—	—	—		Calado et al., 2018
RP38	67	—	—	—	exon 26	c.4957dupA	p.S1653Kfs*2	Frameshift	P	exon 26	c.4957dupA	p.S1653Kfs*2	Frameshift	P	—	—	—	—		Seko et al., 2018
RP174	58	—	—	—	exon 26	c.4957dupA	p.S1653Kfs*2	Frameshift	P	exon 43	c.8805C>A	p.Y2935X	Nonsense	P	—	—	—	—
RP165	79	—	—	—	exon 26	c.4957dupA	p.S1653Kfs*2	Frameshift	P	exon 8	c.1211dupA	p.N404Kfs*3	Frameshift	P	—	—	—	—
FRP-621 II:3	—	—	—	—	exon 23	c.3567delA	p.G1190Dfs*39	Frameshift	P	exon 43	c.8779T>C	p.C2927R	Missense	LP	—	—	—	—		Fuster-García et al., 2019
RP038 II-1	—	—	—	—	exon 26	c.4957dupA	p.S1653Kfs*2	Frameshift	P	exon 26	c.4957dupA	p.S1653Kfs*2	Frameshift	P	—	—	—	—		Iwanami et al., 2019
RP140 II-2	—	—	—	—	exon 43	c.8805C>A	p.Y2935X	Nonsense	P	exon 43	c.8805C>A	p.Y2935X	Nonsense	P	—	—	—	—
RP193 II-1	—	—	—	—	exon 16	c.2528G>A	p.G843E	Missense	LP	exon 16	c.2528G>A	p.G843E	Missense	LP	—	—	—	—
RP028 II-2	—	—	—	—	exon 26	c.4957dupA	p.S1653Kfs*2	Frameshift	P	exon 16	c.2528G>A	p.G843E	Missense	LP	—	—	—	—
RP167 II-2	—	—	—	—	exon 26	c.4957dupA	p.S1653Kfs*2	Frameshift	P	exon 16	c.2528G>A	p.G843E	Missense	LP	—	—	—	—
RP151 I-2	—	—	—	—	exon 26	c.4957dupA	p.S1653Kfs*2	Frameshift	P	exon 16	c.2528G>A	p.G843E	Missense	LP	—	—	—	—
RP206 II-4	—	—	—	—	exon 26	c.4957dupA	p.S1653Kfs*2	Frameshift	P	exon 16	c.2528G>A	p.G843E	Missense	LP	—	—	—	—
RP174 II-3	—	—	—	—	exon 26	c.4957dupA	p.S1653Kfs*2	Frameshift	P	exon 43	c.8805C>A	p.Y2935X	Nonsense	P	—	—	—	—
RP174 III-2	—	—	—	—	exon 43	c.8805C>A	p.Y2935X	Nonsense	P	exon 16	c.2528G>A	p.G843E	Missense	LP	—	—	—	—
RP134 II-2	—	—	—	—	exon 43	c.8805C>A	p.Y2935X	Nonsense	P	exon 16	c.2528G>A	p.G843E	Missense	LP	—	—	—	—
RP244 II-3	—	—	—	—	exon 43	c.8805C>A	p.Y2935X	Nonsense	P	exon 16	c.2528G>A	p.G843E	Missense	LP	—	—	—	—
RP020 II-1	—	—	—	—	exon 32	c.6557G>A	p.G2186E	Missense	LP	exon 32	c.6557G>A	p.G2186E	Missense	LP	—	—	—	—
RP068 II-1	—	—	—	—	exon 26	c.4957dupA	p.S1653Kfs*2	Frameshift	P	exon 32	c.6557G>A	p.G2186E	Missense	LP	—	—	—	—
RP210 II-2	—	—	—	—	exon 43	c.8805C>A	p.Y2935X	Nonsense	P	exon 32	c.6557G>A	p.G2186E	Missense	LP	—	—	—	—
RP171 II-1	—	—	—	—	exon 16	c.2528G>A	p.G843E	Missense	LP	exon 32	c.6563T>C	p.I2188T	Missense	LP	—	—	—	—
RP233 I-2	—	—	—	—	exon 16	c.2528G>A	p.G843E	Missense	LP	exon 32	c.6563T>C	p.I2188T	Missense	LP	—	—	—	—
ARRP01 II-1	—	—	—	—	exon 43	c.9252_9253insT	p.C3085Lfs*7	Frameshift	P	exon 43	c.9252_9253insT	p.C3085Lfs*7	Frameshift	P	—	—	—	—		Sun et al., 2020a
ARRP02 II-1	—	—	—	—	exon 12	c.1920_1923delTGAG	p.C640X	Nonsense	P	Intron 26	c.5644+2T>C	—	Splicing	P	—	—	—	—
M195 II:1	56	—	—	—	exon 32	c.6557G>A	p.G2186E	Missense	LP	exon 16	c.2504G>A	p.C835Y	Missense	US	—	—	—	—		Wei et al., 2020
F35–1	—	—	—	—	exon 41	c.8012T>A	p.L2671X	Nonsense	P	exon 4	c.704G>A	p.W235X	Nonsense	P	—	—	—	—		Huang et al., 2015
W127–1	—	—	—	—	exon 32	c.6557G>A	p.G2186E	Missense	LP	exon 43	c.9186_9187delCA	p.N3062Kfs*9	Frameshift	P	—	—	—	—
W286–1	—	—	—	—	exon 31	c.6416G>A	p.C2139Y	Missense	LP	exon 42	c.8150delA	p.K2717Rfs*24	Frameshift	P	—	—	—	—
F11–1	—	—	—	—	exon 16	c.2510G>T	p.C837F	Missense	LP	exon 42	c.8107G>T	p.E2703X	Nonsense	P	—	—	—	—
W86–1	—	—	—	—	exon 31	c.6416G>A	p.C2139Y	Missense	LP	exon 43	c.8392delG	p.D2798Ifs*2	Frameshift	P	—	—	—	—
W5–1	—	—	—	—	exon 43	c.9368A>C	p.N3123T	Missense	US	exon 31	c.6416G>A	p.C2139Y	Missense	LP	—	—	—	—
W75–1	—	—	—	—	exon 31	c.6416G>A	p.C2139Y	Missense	LP	exon 31	c.6416G>A	p.C2139Y	Missense	LP	—	—	—	—
Abbreviations：ACMG,classification of variants according to American College of Medical Genetics; P=pathogenic; LP=likely_pathogenic; US=uncertain significance
References
Abd El-Aziz, M.M., Barragan, I., O'Driscoll, C.A., Goodstadt, L., Prigmore, E., Borrego, S., et al. (2008). EYS, encoding an ortholog of Drosophila spacemaker, is mutated in autosomal recessive retinitis pigmentosa. Nat Genet 40(11), 1285-1287. doi: 10.1038/ng.241.
Abd El-Aziz, M.M., O'Driscoll, C.A., Kaye, R.S., Barragan, I., El-Ashry, M.F., Borrego, S., et al. (2010). Identification of novel mutations in the ortholog of Drosophila eyes shut gene (EYS) causing autosomal recessive retinitis pigmentosa. Invest Ophthalmol Vis Sci 51(8), 4266-4272. doi: 10.1167/iovs.09-5109.
Abu-Safieh, L., Alrashed, M., Anazi, S., Alkuraya, H., Khan, A.O., Al-Owain, M., et al. (2013). Autozygome-guided exome sequencing in retinal dystrophy patients reveals pathogenetic mutations and novel candidate disease genes. Genome Res 23(2), 236-247. doi: 10.1101/gr.144105.112.
Arai, Y., Maeda, A., Hirami, Y., Ishigami, C., Kosugi, S., Mandai, M., et al. (2015). Retinitis Pigmentosa with EYS Mutations Is the Most Prevalent Inherited Retinal Dystrophy in Japanese Populations. J Ophthalmol 2015, 819760. doi: 10.1155/2015/819760.
Audo, I., Bujakowska, K.M., Léveillard, T., Mohand-Saïd, S., Lancelot, M.E., Germain, A., et al. (2012). Development and application of a next-generation-sequencing (NGS) approach to detect known and novel gene defects underlying retinal diseases. Orphanet J Rare Dis 7, 8. doi: 10.1186/1750-1172-7-8.
Avela, K., Sankila, E.M., Seitsonen, S., Kuuluvainen, L., Barton, S., Gillies, S., et al. (2018). A founder mutation in CERKL is a major cause of retinal dystrophy in Finland. Acta Ophthalmol 96(2), 183-191. doi: 10.1111/aos.13551.
Bandah-Rozenfeld, D., Littink, K.W., Ben-Yosef, T., Strom, T.M., Chowers, I., Collin, R.W., et al. (2010). Novel null mutations in the EYS gene are a frequent cause of autosomal recessive retinitis pigmentosa in the Israeli population. Invest Ophthalmol Vis Sci 51(9), 4387-4394. doi: 10.1167/iovs.09-4732.
Barragán, I., Borrego, S., Pieras, J.I., González-del Pozo, M., Santoyo, J., Ayuso, C., et al. (2010). Mutation spectrum of EYS in Spanish patients with autosomal recessive retinitis pigmentosa. Hum Mutat 31(11), E1772-1800. doi: 10.1002/humu.21334.
Birtel, J., Gliem, M., Mangold, E., Müller, P.L., Holz, F.G., Neuhaus, C., et al. (2018). Next-generation sequencing identifies unexpected genotype-phenotype correlations in patients with retinitis pigmentosa. PLoS One 13(12), e0207958. doi: 10.1371/journal.pone.0207958.
Bonilha, V.L., Rayborn, M.E., Bell, B.A., Marino, M.J., Pauer, G.J., Beight, C.D., et al. (2015). Histopathological comparison of eyes from patients with autosomal recessive retinitis pigmentosa caused by novel EYS mutations. Graefes Arch Clin Exp Ophthalmol 253(2), 295-305. doi: 10.1007/s00417-014-2868-z.
Calado, S.M., Garcia-Delgado, A.B., De la Cerda, B., Ponte-Zuñiga, B., Bhattacharya, S.S., and Díaz-Corrales, F.J. (2018). Generation of a human iPS cell line from a patient with retinitis pigmentosa due to EYS mutation. Stem Cell Res 33, 251-254. doi: 10.1016/j.scr.2018.11.002.
Chen, X., Liu, X., Sheng, X., Gao, X., Zhang, X., Li, Z., et al. (2015). Targeted next-generation sequencing reveals novel EYS mutations in Chinese families with autosomal recessive retinitis pigmentosa. Sci Rep 5, 8927. doi: 10.1038/srep08927.
Cho, A., Lima de Carvalho, J.R., Jr., Tanaka, A.J., Jauregui, R., Levi, S.R., Bassuk, A.G., et al. (2020). Fundoscopy-directed genetic testing to re-evaluate negative whole exome sequencing results. Orphanet J Rare Dis 15(1), 32. doi: 10.1186/s13023-020-1312-1.
Collin, R.W., Littink, K.W., Klevering, B.J., van den Born, L.I., Koenekoop, R.K., Zonneveld, M.N., et al. (2008). Identification of a 2 Mb human ortholog of Drosophila eyes shut/spacemaker that is mutated in patients with retinitis pigmentosa. Am J Hum Genet 83(5), 594-603. doi: 10.1016/j.ajhg.2008.10.014.
Consugar, M.B., Navarro-Gomez, D., Place, E.M., Bujakowska, K.M., Sousa, M.E., Fonseca-Kelly, Z.D., et al. (2015). Panel-based genetic diagnostic testing for inherited eye diseases is highly accurate and reproducible, and more sensitive for variant detection, than exome sequencing. Genet Med 17(4), 253-261. doi: 10.1038/gim.2014.172.
Dan, H., Huang, X., Xing, Y., and Shen, Y. (2020). Application of targeted panel sequencing and whole exome sequencing for 76 Chinese families with retinitis pigmentosa. Mol Genet Genomic Med 8(3), e1131. doi: 10.1002/mgg3.1131.
Di, Y., Huang, L., Sundaresan, P., Li, S., Kim, R., Ballav Saikia, B., et al. (2016). Whole-exome Sequencing Analysis Identifies Mutations in the EYS Gene in Retinitis Pigmentosa in the Indian Population. Sci Rep 6, 19432. doi: 10.1038/srep19432.
Eisenberger, T., Neuhaus, C., Khan, A.O., Decker, C., Preising, M.N., Friedburg, C., et al. (2013). Increasing the yield in targeted next-generation sequencing by implicating CNV analysis, non-coding exons and the overall variant load: the example of retinal dystrophies. PLoS One 8(11), e78496. doi: 10.1371/journal.pone.0078496.
Fuster-García, C., García-García, G., Jaijo, T., Blanco-Kelly, F., Tian, L., Hakonarson, H., et al. (2019). Expanding the Genetic Landscape of Usher-Like Phenotypes. Invest Ophthalmol Vis Sci 60(14), 4701-4710. doi: 10.1167/iovs.19-27470.
Ge, Z., Bowles, K., Goetz, K., Scholl, H.P., Wang, F., Wang, X., et al. (2015). NGS-based Molecular diagnosis of 105 eyeGENE(®) probands with Retinitis Pigmentosa. Sci Rep 5, 18287. doi: 10.1038/srep18287.
Glöckle, N., Kohl, S., Mohr, J., Scheurenbrand, T., Sprecher, A., Weisschuh, N., et al. (2014). Panel-based next generation sequencing as a reliable and efficient technique to detect mutations in unselected patients with retinal dystrophies. Eur J Hum Genet 22(1), 99-104. doi: 10.1038/ejhg.2013.72.
González-del Pozo, M., Borrego, S., Barragán, I., Pieras, J.I., Santoyo, J., Matamala, N., et al. (2011). Mutation screening of multiple genes in Spanish patients with autosomal recessive retinitis pigmentosa by targeted resequencing. PLoS One 6(12), e27894. doi: 10.1371/journal.pone.0027894.
Gu, S., Tian, Y., Chen, X., and Zhao, C. (2016). Targeted next-generation sequencing extends the phenotypic and mutational spectrums for EYS mutations. Mol Vis 22, 646-657.
Habibi, I., Chebil, A., Falfoul, Y., Allaman-Pillet, N., Kort, F., Schorderet, D.F., et al. (2016). Identifying mutations in Tunisian families with retinal dystrophy. Sci Rep 6(1), 37455. doi: 10.1038/srep37455.
Hashmi, J.A., Albarry, M.A., Almatrafi, A.M., Albalawi, A.M., Mahmood, A., and Basit, S. (2018). Whole exome sequencing identified a novel single base pair insertion mutation in the EYS gene in a six generation family with retinitis pigmentosa. Congenit Anom (Kyoto) 58(1), 10-15. doi: 10.1111/cga.12225.
Hirashima, T., Miyata, M., Ishihara, K., Hasegawa, T., Sugahara, M., Ogino, K., et al. (2017). Choroidal Vasculature in Bietti Crystalline Dystrophy With CYP4V2 Mutations and in Retinitis Pigmentosa With EYS Mutations. Invest Ophthalmol Vis Sci 58(10), 3871-3878. doi: 10.1167/iovs.17-21515.
Hosono, K., Ishigami, C., Takahashi, M., Park, D.H., Hirami, Y., Nakanishi, H., et al. (2012). Two novel mutations in the EYS gene are possible major causes of autosomal recessive retinitis pigmentosa in the Japanese population. PLoS One 7(2), e31036. doi: 10.1371/journal.pone.0031036.
Huang, L., Zhang, Q., Huang, X., Qu, C., Ma, S., Mao, Y., et al. (2017). Mutation screening in genes known to be responsible for Retinitis Pigmentosa in 98 Small Han Chinese Families. Sci Rep 7(1), 1948. doi: 10.1038/s41598-017-00963-6.
Huang, X.F., Huang, F., Wu, K.C., Wu, J., Chen, J., Pang, C.P., et al. (2015). Genotype-phenotype correlation and mutation spectrum in a large cohort of patients with inherited retinal dystrophy revealed by next-generation sequencing. Genet Med 17(4), 271-278. doi: 10.1038/gim.2014.138.
Huang, Y., Zhang, J., Li, C., Yang, G., Liu, M., Wang, Q.K., et al. (2010). Identification of a novel homozygous nonsense mutation in EYS in a Chinese family with autosomal recessive retinitis pigmentosa. BMC Med Genet 11, 121. doi: 10.1186/1471-2350-11-121.
Iwanami, M., Oishi, A., Ogino, K., Seko, Y., Nishida-Shimizu, T., Yoshimura, N., et al. (2019). Five major sequence variants and copy number variants in the EYS gene account for one-third of Japanese patients with autosomal recessive and simplex retinitis pigmentosa. Mol Vis 25, 766-779.
Iwanami, M., Oshikawa, M., Nishida, T., Nakadomari, S., and Kato, S. (2012). High prevalence of mutations in the EYS gene in Japanese patients with autosomal recessive retinitis pigmentosa. Invest Ophthalmol Vis Sci 53(2), 1033-1040. doi: 10.1167/iovs.11-9048.
Jespersgaard, C., Fang, M., Bertelsen, M., Dang, X., Jensen, H., Chen, Y., et al. (2019). Molecular genetic analysis using targeted NGS analysis of 677 individuals with retinal dystrophy. Sci Rep 9(1), 1219. doi: 10.1038/s41598-018-38007-2.
Jinda, W., Taylor, T.D., Suzuki, Y., Thongnoppakhun, W., Limwongse, C., Lertrit, P., et al. (2014). Whole exome sequencing in Thai patients with retinitis pigmentosa reveals novel mutations in six genes. Invest Ophthalmol Vis Sci 55(4), 2259-2268. doi: 10.1167/iovs.13-13567.
Kastner, S., Thiemann, I.J., Dekomien, G., Petrasch-Parwez, E., Schreiber, S., Akkad, D.A., et al. (2015). Exome Sequencing Reveals AGBL5 as Novel Candidate Gene and Additional Variants for Retinitis Pigmentosa in Five Turkish Families. Invest Ophthalmol Vis Sci 56(13), 8045-8053. doi: 10.1167/iovs.15-17473.
Katagiri, S., Akahori, M., Hayashi, T., Yoshitake, K., Gekka, T., Ikeo, K., et al. (2014). Autosomal recessive cone-rod dystrophy associated with compound heterozygous mutations in the EYS gene. Doc Ophthalmol 128(3), 211-217. doi: 10.1007/s10633-014-9435-0.
Khan, M.I., Collin, R.W., Arimadyo, K., Micheal, S., Azam, M., Qureshi, N., et al. (2010). Missense mutations at homologous positions in the fourth and fifth laminin A G-like domains of eyes shut homolog cause autosomal recessive retinitis pigmentosa. Mol Vis 16, 2753-2759.
Littink, K.W., van den Born, L.I., Koenekoop, R.K., Collin, R.W., Zonneveld, M.N., Blokland, E.A., et al. (2010). Mutations in the EYS gene account for approximately 5% of autosomal recessive retinitis pigmentosa and cause a fairly homogeneous phenotype. Ophthalmology 117(10), 2026-2033, 2033.e2021-2027. doi: 10.1016/j.ophtha.2010.01.040.
McGuigan, D.B., Heon, E., Cideciyan, A.V., Ratnapriya, R., Lu, M., Sumaroka, A., et al. (2017). EYS Mutations Causing Autosomal Recessive Retinitis Pigmentosa: Changes of Retinal Structure and Function with Disease Progression. Genes (Basel) 8(7). doi: 10.3390/genes8070178.
Mucciolo, D.P., Sodi, A., Passerini, I., Murro, V., Cipollini, F., Borg, I., et al. (2018). Fundus phenotype in retinitis pigmentosa associated with EYS mutations. Ophthalmic Genet 39(5), 589-602. doi: 10.1080/13816810.2018.1509351.
Neveling, K., Collin, R.W., Gilissen, C., van Huet, R.A., Visser, L., Kwint, M.P., et al. (2012). Next-generation genetic testing for retinitis pigmentosa. Hum Mutat 33(6), 963-972. doi: 10.1002/humu.22045.
Nishiguchi, K.M., Tearle, R.G., Liu, Y.P., Oh, E.C., Miyake, N., Benaglio, P., et al. (2013). Whole genome sequencing in patients with retinitis pigmentosa reveals pathogenic DNA structural changes and NEK2 as a new disease gene. Proc Natl Acad Sci U S A 110(40), 16139-16144. doi: 10.1073/pnas.1308243110.
O'Sullivan, J., Mullaney, B.G., Bhaskar, S.S., Dickerson, J.E., Hall, G., O'Grady, A., et al. (2012). A paradigm shift in the delivery of services for diagnosis of inherited retinal disease. J Med Genet 49(5), 322-326. doi: 10.1136/jmedgenet-2012-100847.
Perez-Carro, R., Corton, M., Sánchez-Navarro, I., Zurita, O., Sanchez-Bolivar, N., Sánchez-Alcudia, R., et al. (2016). Panel-based NGS Reveals Novel Pathogenic Mutations in Autosomal Recessive Retinitis Pigmentosa. Sci Rep 6, 19531. doi: 10.1038/srep19531.
Pieras, J.I., Barragán, I., Borrego, S., Audo, I., González-Del Pozo, M., Bernal, S., et al. (2011). Copy-number variations in EYS: a significant event in the appearance of arRP. Invest Ophthalmol Vis Sci 52(8), 5625-5631. doi: 10.1167/iovs.11-7292.
Pierrache, L.H.M., Messchaert, M., Thiadens, A., Haer-Wigman, L., de Jong-Hesse, Y., van Zelst-Stams, W.A.G., et al. (2019). Extending the Spectrum of EYS-Associated Retinal Disease to Macular Dystrophy. Invest Ophthalmol Vis Sci 60(6), 2049-2063. doi: 10.1167/iovs.18-25531.
Pierrottet, C.O., Zuntini, M., Digiuni, M., Bazzanella, I., Ferri, P., Paderni, R., et al. (2014). Syndromic and non-syndromic forms of retinitis pigmentosa: a comprehensive Italian clinical and molecular study reveals new mutations. Genet Mol Res 13(4), 8815-8833. doi: 10.4238/2014.October.27.23.
Seko, Y., Iwanami, M., Miyamoto-Matsui, K., Takita, S., Aoi, N., Umezawa, A., et al. (2018). The manner of decay of genetically defective EYS gene transcripts in photoreceptor-directed fibroblasts derived from retinitis pigmentosa patients depends on the type of mutation. Stem Cell Res Ther 9(1), 279. doi: 10.1186/s13287-018-1016-9.
Sengillo, J.D., Lee, W., Nagasaki, T., Schuerch, K., Yannuzzi, L.A., Freund, K.B., et al. (2018). A Distinct Phenotype of Eyes Shut Homolog (EYS)-Retinitis Pigmentosa Is Associated With Variants Near the C-Terminus. Am J Ophthalmol 190, 99-112. doi: 10.1016/j.ajo.2018.03.008.
Siemiatkowska, A.M., Arimadyo, K., Moruz, L.M., Astuti, G.D., de Castro-Miro, M., Zonneveld, M.N., et al. (2011). Molecular genetic analysis of retinitis pigmentosa in Indonesia using genome-wide homozygosity mapping. Mol Vis 17, 3013-3024.
Sun, Y., Li, J.K., He, W., Wang, Z.S., Bai, J.Y., Xu, L., et al. (2020a). Genetic and clinical analysis in Chinese patients with retinitis pigmentosa caused by EYS mutations. Mol Genet Genomic Med 8(3), e1117. doi: 10.1002/mgg3.1117.
Sun, Y., Li, W., Li, J.K., Wang, Z.S., Bai, J.Y., Xu, L., et al. (2020b). Genetic and clinical findings of panel-based targeted exome sequencing in a northeast Chinese cohort with retinitis pigmentosa. Mol Genet Genomic Med 8(4), e1184. doi: 10.1002/mgg3.1184.
Suto, K., Hosono, K., Takahashi, M., Hirami, Y., Arai, Y., Nagase, Y., et al. (2014). Clinical phenotype in ten unrelated Japanese patients with mutations in the EYS gene. Ophthalmic Genet 35(1), 25-34. doi: 10.3109/13816810.2013.768673.
Wei, C., Xiao, T., Cheng, J., Fu, J., Zhou, Q., Yang, L., et al. (2020). Novel compound heterozygous EYS variants may be associated with arRP in a large Chinese pedigree. Biosci Rep 40(6). doi: 10.1042/bsr20193443.
Wormser, O., Gradstein, L., Kadar, E., Yogev, Y., Perez, Y., Mashkit, E., et al. (2018). Combined CNV, haplotyping and whole exome sequencing enable identification of two distinct novel EYS mutations causing RP in a single inbred tribe. Am J Med Genet A 176(12), 2695-2703. doi: 10.1002/ajmg.a.40668.
Xiao, X., Cao, Y., Chen, S., Chen, M., Mai, X., Zheng, Y., et al. (2019). Whole exome sequencing reveals novel EYS mutations in Chinese patients with autosomal recessive retinitis pigmentosa. Mol Vis 25, 35-46.
Xu, Y., Guan, L., Shen, T., Zhang, J., Xiao, X., Jiang, H., et al. (2014). Mutations of 60 known causative genes in 157 families with retinitis pigmentosa based on exome sequencing. Hum Genet 133(10), 1255-1271. doi: 10.1007/s00439-014-1460-2.
Yang, L., Fujinami, K., Ueno, S., Kuniyoshi, K., Hayashi, T., Kondo, M., et al. (2020). Genetic Spectrum of EYS-associated Retinal Disease in a Large Japanese Cohort: Identification of Disease-associated Variants with Relatively High Allele Frequency. Sci Rep 10(1), 5497. doi: 10.1038/s41598-020-62119-3.
Yoon, C.K., Kim, N.K., Joung, J.G., Shin, J.Y., Park, J.H., Eum, H.H., et al. (2015). The diagnostic application of targeted re-sequencing in Korean patients with retinitis pigmentosa. BMC Genomics 16(1), 515. doi: 10.1186/s12864-015-1723-x.
