# Supplementary material for: Genotype Profile of Global EYS-Associated Inherited Retinal Dystrophy and Clinical Findings in a Large Chinese Cohort
Source: Front Cell Dev Biol. 2021 Jun 11;9:634220. doi: 10.3389/fcell.2021.634220 (PMC8226124; doi:10.3389/fcell.2021.634220)
Supplement: Supplementary file 3 [file Table_2.XLSX]

## Sheet: Sheet1
Table S2. EYS gene variants identified in this study and analysis of the variants by predictive
No.	Exon	Nucleotide change	Protein effect	Allele numbers	Variant type	Polyphen- 2	Mutation Taster	SIFT	ada_score	rf_score	ExAC_ALL	ExAC_EAS	genome_EAS	genome_ALL	ACMG	Source
1	5'UTR	c.-448+5G>A	—	1	splice	-	D	-	0.995916	0.918	-	-	3.233e-05	0	P	Eisenberger et al., 2013
2	exon4	c.359C>G	p.T120R	1	missense	B	B	D	-	-	4.12e-05	0.0006	3.232e-05	0.0006	US	Novel
3	exon11	c.1661_1662insATG	p.C554delinsX	1	nonsense	-	D	-	-	-	-	-	-	-	P	Novel
4	exon11	c.1750G>T	p.E584X	5	nonsense	-	D	-	-	-	-	-	-	-	P	Hirashima et al., 2017
5	exon13-22	Ex13-22 del	—	1	gross deletion	-	-	-	-	-	-	-	-	-	P	Novel
6	exon14	c.2157C>A	p.C719X	2	nonsense	-	D	-	-	-	-	-	-	-	P	Novel
7	IVS 14	c.2259+1G>A	—	2	splice	-	D	-	0.99984	-	4.491e-05	0	3.232e-05	0	P	Mucciolo et al., 2018
8	exon15	c.2318dupA	p.N773Kfs*2	1	frameshift	-	D	-	-	-	-	-	-	-	P	Sun et al., 2018
9	exon15	c.2380C>T	p.R794X	1	nonsense	-	D	-	-	-	5.06e-05	0	-	-	P	Arai et al., 2015
10	exon23	c.3548_3549delAT	p.Y1183Cfs*14	1	frameshift	-	D	-	-	-	-	-	-	-	P	Novel
11	exon23	Ex23 del	—	1	gross deletion	-	-	-	-	-	-	-	-	-	P	Novel
12	exon26	c.4120C>T	p.R1374X	2	nonsense	-	D	-	-	-	-	-	3.232e-05	0	P	Sengillo et al., 2018
13	exon26	c.4628C>G	p.S1543X	1	nonsense	-	D	-	-	-	-	-	-	-	P	Novel
14	exon26	c.4655T>A	p.L1552X	1	nonsense	-	D	-	-	-	-	-	-	-	P	Gao et al., 2019
15	exon26	c.4957dupA	p.S1653Kfs*2	1	frameshift	-	D	-	-	-	-	-	-	-	P	Gu et al., 2016
16	exon26	c.5254dupA	p.I1752Nfs*18	2	frameshift	-	D	-	-	-	-	-	-	-	P	Wang et al., 2018
17	exon26	c.5488G>T	p.E1830X	1	nonsense	-	D	-	-	-	-	-	-	-	P	Novel
18	IVS 26	c.5644+5G>A	—	2	splice	-	D	-	0.999955	0.948	-	-	3.232e-05	0.0006	P	Yang et al., 2020
19	exon27	c.5677_5681delTATCT	p.Y1893Rfs*12	2	frameshift	-	D	-	-	-	-	-	3.236e-05	0	P	Novel
20	exon27	c.5825G>T	p.G1942V	1	missense	D	D	D	-	-	-	-	-	-	LP	Gao et al., 2019
21	exon30	c.6105_6106insATTTTACT	p.G2036Ifs*6	1	frameshift	-	D	-	-	-	-	-	-	-	P	Novel
22	exon31	c.6416G>A	p.C2139Y	3	missense	D	B	D	-	-	5.274e-05	0.0017	0.0001	0.0025	LP	Gu et al., 2016
23	exon31	c.6269G>A	p.W2090X	2	nonsense	-	D	-	-	-	-	-	-	-	P	Novel
24	exon32	c.6539_6542delAAAC	p.N2182Vfs*2	1	frameshift	-	D	-	-	-	-	-	-	-	P	Birtel et al., 2018
25	exon32	c.6557G>A	p.G2186E	7	missense	D	B	D	-	-	-	-	-	-	LP	Gu et al., 2016
26	exon32	c.6544_6547delAACA	p.N2182Vfs*2	1	frameshift	-	D	-	-	-	-	-	-	-	P	Birtel et al., 2018
27	exon34	Ex34 dup	—	1	gross insert	-	-	-	-	-	-	-	-	-	P	Novel
28	IVS 36	c.7228+1G>A	—	4	splice	-	D	-	0.999982	0.938	-	-	6.456e-05	0.0006	P	Gu et al., 2016
29	exon37	c.7327G>T	p.E2443X	1	nonsense	-	D	-	-	-	-	-	-	-	P	Novel
30	exon37	c.7376_7377insA	p.N2459Kfs*2	1	frameshift	-	D	-	-	-	-	-	-	-	P	Xu et al., 2014
31	exon38	c.7492G>C	p.A2498P	5	missense	B	B	D	-	-	-	-	-	-	LP	Huang et al., 2015
32	exon39	c.7708A>T	p.K2570X	1	nonsense	-	D	-	-	-	-	-	-	-	P	Novel
33	IVS 39	c.7723+1G>A	—	1	splice	-	D	-	0.999976	0.886	-	-	-	-	P	Gao et al., 2017
34	exon40	c.7761delT	p.D2587Efs*30	1	frameshift	-	D	-	-	-	-	-	-	-	P	Novel
35	exon42	c.8096T>C	p.F2699S	3	missense	B	D	D	-	-	-	-	-	-	LP	Huang et al., 2018
36	exon42	c.8102delG	p.S2701Tfs*40	1	frameshift	-	D	-	-	-	-	-	-	-	P	Novel
37	exon42	c.8114C>T	p.S2705F	1	missense	D	D	D	-	-	-	-	-	-	LP	Novel
38	exon43	c.8242_8243delTT	p.L2748Mfs*7	1	frameshift	-	D	-	-	-	-	-	-	-	P	Tian et al., 2020
39	exon43	c.8309T>C	p.L2770P	3	missense	D	D	D	-	-	-	-	-	-	P	Gao et al., 2019
40	exon43	c.8392delG	p.D2798Ifs*2	1	frameshift	-	D	-	-	-	-	-	-	-	P	Huang et al., 2015
41	exon43	c.8545C>T	p.R2849X	1	nonsense	-	D	-	-	-	-	-	-	-	P	Dan et al., 2020
42	exon43	c.8805C>A	p.Y2935X	4	nonsense	-	D	-	-	-	-	-	6.46e-05	0.0012	P	Suto et al., 2014
43	exon43	c.9002C>T	p.A3001V	1	missense	B	B	D	-	-	-	-	-	-	US	Novel
44	exon43	c.9019G>T	p.D3007Y	1	missense	D	B	D	-	-	-	-	3.235e-05	0	LP	Siemiatkowska et al., 2011
45	exon43	c.9160A>G	p.T3054A	1	missense	D	D	D	-	-	-	-	-	-	LP	Novel
Abbreviations：B=benign; D=damaging; ada_score=esemble prediction score based on ada-boost; rf_score=ensemble prediction score based on random forests; ExAC_ALL=Exome Aggregation Consortium ExAC; ExAC_EAS=Exome Aggregation Consortium ExAC East Asian ExAC; genome_ALL=the Genome Aggregation Database;genome_EAS=the Genome Aggregation Database East Asian; ACMG,classification of variants according to A…
References
Arai, Y., Maeda, A., Hirami, Y., Ishigami, C., Kosugi, S., Mandai, M., et al. (2015). Retinitis Pigmentosa with EYS Mutations Is the Most Prevalent Inherited Retinal Dystrophy in Japanese Populations. J Ophthalmol 2015, 819760. doi: 10.1155/2015/819760.
Birtel, J., Gliem, M., Mangold, E., Müller, P.L., Holz, F.G., Neuhaus, C., et al. (2018). Next-generation sequencing identifies unexpected genotype-phenotype correlations in patients with retinitis pigmentosa. PLoS One 13, e0207958. doi: 10.1371/journal.pone.0207958.
Dan, H., Huang, X., Xing, Y., and Shen, Y. (2020). Application of targeted panel sequencing and whole exome sequencing for 76 Chinese families with retinitis pigmentosa. Mol Genet Genomic Med 8, e1131. doi: 10.1002/mgg3.1131.
Eisenberger, T., Neuhaus, C., Khan, A.O., Decker, C., Preising, M.N., Friedburg, C., et al. (2013). Increasing the yield in targeted next-generation sequencing by implicating CNV analysis, non-coding exons and the overall variant load: the example of retinal dystrophies. PLoS One 8, e78496. doi: 10.1371/journal.pone.0078496.
Gao, F.J., Li, J.K., Chen, H., Hu, F.Y., Zhang, S.H., Qi, Y.H., et al. (2019). Genetic and Clinical Findings in a Large Cohort of Chinese Patients with Suspected Retinitis Pigmentosa. Ophthalmology 126, 1549-1556. doi: 10.1016/j.ophtha.2019.04.038.
Gao, F.J., Zhang, S.H., Chen, J.Y., Xu, G.Z., and Wu, J.H. (2017). Digenic heterozygous mutations in EYS/LRP5 in a Chinese family with retinitis pigmentosa. Int J Ophthalmol 10, 325-328. doi: 10.18240/ijo.2017.02.25.
Gu, S., Tian, Y., Chen, X., and Zhao, C. (2016). Targeted next-generation sequencing extends the phenotypic and mutational spectrums for EYS mutations. Mol Vis 22, 646-657.
Hirashima, T., Miyata, M., Ishihara, K., Hasegawa, T., Sugahara, M., Ogino, K., et al. (2017). Choroidal Vasculature in Bietti Crystalline Dystrophy With CYP4V2 Mutations and in Retinitis Pigmentosa With EYS Mutations. Invest Ophthalmol Vis Sci 58, 3871-3878. doi: 10.1167/iovs.17-21515.
Huang, H., Chen, Y., Chen, H., Ma, Y., Chiang, P.W., Zhong, J., et al. (2018). Systematic evaluation of a targeted gene capture sequencing panel for molecular diagnosis of retinitis pigmentosa. PLoS One 13, e0185237. doi: 10.1371/journal.pone.0185237.
Huang, X.F., Huang, F., Wu, K.C., Wu, J., Chen, J., Pang, C.P., et al. (2015). Genotype-phenotype correlation and mutation spectrum in a large cohort of patients with inherited retinal dystrophy revealed by next-generation sequencing. Genet Med 17, 271-278. doi: 10.1038/gim.2014.138.
Mucciolo, D.P., Sodi, A., Passerini, I., Murro, V., Cipollini, F., Borg, I., et al. (2018). Fundus phenotype in retinitis pigmentosa associated with EYS mutations. Ophthalmic Genet 39, 589-602. doi: 10.1080/13816810.2018.1509351.
Sengillo, J.D., Lee, W., Nagasaki, T., Schuerch, K., Yannuzzi, L.A., Freund, K.B., et al. (2018). A Distinct Phenotype of Eyes Shut Homolog (EYS)-Retinitis Pigmentosa Is Associated With Variants Near the C-Terminus. Am J Ophthalmol 190, 99-112. doi: 10.1016/j.ajo.2018.03.008.
Siemiatkowska, A.M., Arimadyo, K., Moruz, L.M., Astuti, G.D., de Castro-Miro, M., Zonneveld, M.N., et al. (2011). Molecular genetic analysis of retinitis pigmentosa in Indonesia using genome-wide homozygosity mapping. Mol Vis 17, 3013-3024.
Sun, T., Xu, K., Ren, Y., Xie, Y., Zhang, X., Tian, L., et al. (2018). Comprehensive Molecular Screening in Chinese Usher Syndrome Patients. Invest Ophthalmol Vis Sci 59, 1229-1237. doi: 10.1167/iovs.17-23312.
Suto, K., Hosono, K., Takahashi, M., Hirami, Y., Arai, Y., Nagase, Y., et al. (2014). Clinical phenotype in ten unrelated Japanese patients with mutations in the EYS gene. Ophthalmic Genet 35, 25-34. doi: 10.3109/13816810.2013.768673.
Wang, L., Zhang, J., Chen, N., Wang, L., Zhang, F., Ma, Z., et al. (2018). Application of Whole Exome and Targeted Panel Sequencing in the Clinical Molecular Diagnosis of 319 Chinese Families with Inherited Retinal Dystrophy and Comparison Study. Genes (Basel) 9. doi: 10.3390/genes9070360.
Xu, Y., Guan, L., Shen, T., Zhang, J., Xiao, X., Jiang, H., et al. (2014). Mutations of 60 known causative genes in 157 families with retinitis pigmentosa based on exome sequencing. Hum Genet 133, 1255-1271. doi: 10.1007/s00439-014-1460-2.
Yang, L., Fujinami, K., Ueno, S., Kuniyoshi, K., Hayashi, T., Kondo, M., et al. (2020). Genetic Spectrum of EYS-associated Retinal Disease in a Large Japanese Cohort: Identification of Disease-associated Variants with Relatively High Allele Frequency. Sci Rep 10, 5497. doi: 10.1038/s41598-020-62119-3.

## Sheet: Sheet2
exon23
