# Supplementary material for: Genotype Profile of Global EYS-Associated Inherited Retinal Dystrophy and Clinical Findings in a Large Chinese Cohort
Source: Front Cell Dev Biol. 2021 Jun 11;9:634220. doi: 10.3389/fcell.2021.634220 (PMC8226124; doi:10.3389/fcell.2021.634220)
Supplement: Supplementary file 4 [file Table_3.XLSX]

## Sheet: sheet1
Table S3. The clinical features of G1cohort in this study
Patient ID	Gender	FH	Consanguinity	Age		BCVA	lens opacities	ERG	Diagnosis	Mutations		Fundus	OCT	AF
				Onset	Exam	(OD/OS)				Allele1	Allele2
19091	F	S	NO	25	35	0.9/0.9	NO	Extinguishing	RP	p.E584X	p.S2705F	Macular fovea reflection disappears, RPE atrophy in peripheral retina with relatively preserved macula retina, Sporadic bone spicules pigmentation	NA	NA
19106	M	S	NO	34	35	0.3/0.2	YES	NA	RP	p.N2182Vfs*2	p.G2186E	RPE changes outside vascular arcades with relatively preserved macula retina	NA	NA
19150	M	S	NO	22	32	1.0/1.0	NO	Extinguishing	RP	c.7228+1G>A	p.N2459Kfs*2	Macular fovea reflection disappears, RPE changes outside vascular arcades with relatively preserved macula retina	NA	NA
19325	F	S	NO	20	30	0.5/0.6	NO	Extinguishing	RP	p.E584X	p.E584X	Macular fovea reflection disappears,RPE atrophy in peripheral retina with relatively preserved macula retina, without pigmentation	NA	NA
19358	M	S	NO	15	32	0.5/0.6	NO	NA	RP	p.G2186E	p.A3001V	Macular fovea reflection disappears, RPE changes outside vascular arcades with relatively preserved macula retina, Sporadic bone spicules pigmentation	NA	NA
19387	F	S	NO	20	52	NLP/NLP	YES	NA	RP	p.L2748Mfs*7	p.K2570X	Unclear cataract fundus	NA	NA
19414	F	S	YES	20	50	0.03/0.02	NO	NA	RP	p.C719X	p.C719X	Macular fovea reflection disappears, RPE changes outside vascular arcades with relatively preserved macula retina, Sporadic bone spicules pigmentation	NA	NA
19415	M	S	NO	25	40	0.1/0.2	NO	NA	RP	p.N773Kfs*2	p.G2186E	Extensive RPE atrophy from peripheral to macular, without pigmentation	NA	NA
19429	F	AR	NO	19	49	0.4/0.1	YES	NA	RP	p.G2036Ifs*6	p.I1752Nfs*18	Macular fovea reflection disappears, RPE changes outside vascular arcades with relatively preserved macula retina, Sporadic bone spicules pigmentation	NA	NA
19555	F	S	NO	26	46	0.4/0.3	YES	NA	RP	p.N2182Vfs*2	p.E1830X	Extensive RPE atrophy from peripheral to macular, Sporadic bone spicules pigmentation	NA	NA
19562	F	S	NO	50	62	0.1/0.7	YES	SD	RP	p.Y2935X	p.F2699S	Extensive RPE atrophy from peripheral to macular, without pigmentation	NA	NA
19582	F	S	NO	26	38	0.8/0.8	NO	NA	RP	p.A2498P	p.C2139Y	Macular fovea reflection disappears, RPE changes outside vascular arcades with relatively preserved macula retina, Sporadic bone spicules pigmentation	NA	NA
19611	F	S	NO	13	18	0.8/0.2	NO	Extinguishing	RP	p.D2798Ifs*2	p.E584X	RPE changes outside vascular arcades, macular roughly normal	NA	NA
19667	M	S	NO	18	45	0.2/0.4	YES	NA	RP	p.Y1183Cfs*14	p.R2849X	Macular fovea reflection disappears, RPE changes outside vascular arcades with relatively preserved macula retina, without pigmentation	NA	NA
19741	F	S	NO	35	44	0.7/0.1	YES	NA	RP	p.A2498P	p.A2498P	Macular fovea reflection disappears, RPE changes outside vascular arcades with relatively preserved macula retina, without pigmentation	NA	NA
19822	M	S	NO	17	30	0.9/0.6	NO	Extinguishing	RP	p.D3007Y	p.S1543X	Waxy disc pallor,extensive chorioretinal atrophy with minimal residual RPE at macular region	NA	NA
19847	M	AR	NO	24	44	0.5/0.25	NO	Extinguishing	RP	p.Y2935X	p.E584X	Macular fovea reflection disappears, RPE changes outside vascular arcades with relatively preserved macula retina, Sporadic bone spicules pigmentation	Relatively preserved foveal lamination	NA
19870	F	AR	YES	16	40	0.05/0.1	YES	Extinguishing	RP	c.7228+1G>A	c.7228+1G>A	Macular fovea reflection disappears, RPE changes outside vascular arcades with relatively preserved macula retina, Sporadic bone spicules pigmentation	Outer retina thinning, ellipsoid completely disappeared, RPE atrophied	NA
19897	F	S	NO	40	41	0.5/0.4	NO	Extinguishing	RP	p.F2699S	p.S1653Kfs*2	Extensive RPE atrophy from peripheral to macular, Sporadic bone spicules pigmentation	NA	NA
19916	F	AR	NO	45	57	0.01/0.01	NO	NA	RP	p.G2186E	p.W2090X	Waxy disc pallor,extensive RPE atrophy from peripheral to macular,Sporadic bone spicules pigmentation	outer retina thinning, ellipsoid completely disappeared, RPE atrophied	NA
19927	F	S	NO	14	27	0.8/0.9	NO	Extinguishing	RP	p.A2498P	p.S2701Tfs*40	Macular fovea reflection disappears, RPE changes outside vascular arcades with relatively preserved macula retina, without pigmentation	NA	NA
19934	F	S	NO	36	41	0.3/0.4	YES	Extinguishing	RP	p.C2139Y	c.2259+1G>A	macular fovea reflection disappears,extensive chorioretinal atrophy in peripheral retina	outer retina thinning, relatively preserved foveal lamination	Hyper AF ring at the posterior pole
19962	F	AR	NO	12	26	0.3/0.4	NO	NA	RP	p.A2498P	c.5644+5G>A	Pseudooptic disc edema, RPE changes outside vascular arcades with relatively preserved macula retina	Relatively preserved foveal lamination	NA
19975	M	S	NO	13	28	0.5/0.6	NO	Extinguishing	RP	c.-448+5G>A	c.2259+1G>A	Waxy disc pallor,extensive RPE atrophy from peripheral to macular,Sporadic bone spicules pigmentation	Outer retina thinning, ellipsoid completely disappeared, RPE atrophied	Patchy loss of AF outside the vascular arcade
191025	F	S	NO	12	22	0.7/0.6	NO	Extinguishing	RP	c.7723+1G>A	c.5644+5G>A	Macular fovea reflection disappears, RPE changes outside vascular arcades with relatively preserved macula retina, without pigmentation	Relatively preserved foveal lamination, cysts in the inner nuclear layer	NA
191030	M	AR	NO	13	43	0.3/0.6	YES	NA	RP	p.R794X	Ex23 del	Extensive choroid atrophy with minimal residual RPE outside the macular region	Relatively preserved foveal lamination, ellipsoid and interdigitation zone discontinuity	NA
191040	M	AR	NO	7	47	0.05/0.2	YES	NA	RP	c.7228+1G>A	Ex13-22 del	Widespread RPE and choroidal atrophy, bone spicules and vascular thinning, macular affected	Outer retina thinning, ellipsoid completely disappeared, RPE atrophied with high reflection sediments	NA
191055	F	S	NO	17	27	0.8/0.7	NO	Extinguishing	RP	p.G2186E	p.Y1893Rfs*12	Waxy disc pallor,extensive RPE atrophy from peripheral to macular, without pigmentation	Outer retina thinning, ellipsoid completely disappeared, RPE atrophied with high reflection sediments	NA
191064	F	S	NO	40	55	NLP/HM	NO	Extinguishing	RP	p.Y1893Rfs*12	p.R1374X	Waxy disc pallor,extensive RPE atrophy,massive pigmentation	All retinal layers appear to be affected	NA
191088	M	S	NO	22	42	HM/0.2	YES	Extinguishing	RP	p.T3054A	p.L1552X	Waxy disc pallor,extensive RPE atrophy,massive pigmentation	All retinal layers appear to be affected	NA
191116	F	S	NO	6	33	0.7/1	NO	Extinguishing	RP	p.G2186E	p.R1374X	Macular fovea reflection disappears, RPE changes outside vascular arcades with relatively preserved macula retina, without pigmentation	Relatively preserved foveal lamination	NA
191152	M	S	NO	10	41	0.02/0.01	NO	Extinguishing	RP	p.G2186E	p.D2587Efs*30	Extensive RPE atrophy from peripheral to macular, Sporadic bone spicules pigmentation	Outer retina thinning, ellipsoid completely disappeared, RPE atrophied	Low fluorescence in the whole field
191154-1	M	S	NO	30	41	0.3/0.5	NO	NA	RP	p.E2443X	p.C554delinsX	Macular fovea reflection disappears, RPE changes outside vascular arcades with relatively preserved macula retina, Sporadic bone spicules pigmentation	Outer retina thinning, ellipsoid completely disappeared, RPE atrophied	NA
191253	M	AR	YES	12	35	0.8/0.8	YES	Extinguishing	RP	p.L2770P	p.L2770P	Extensive chorioretinal atrophy with minimal residual RPE at macular region	Outer retina thinning, ellipsoid completely disappeared, RPE atrophied	NA
191325	F	S	NO	4	14	0.4/0.6	NO	NA	RP	p.T120R	Ex34 dup	Extensive chorioretinal atrophy in peripheral retina, macular roughly normal	outer retina thinning, ellipsoid completely disappeared, RPE atrophied	Irregular low AF outside the vascular arcade
191327	F	S	NO	6	46	0.6/0.5	NO	Extinguishing	RP	p.C2139Y	p.G1942V	Extensive chorioretinal atrophy with minimal residual RPE at macular region, Sporadic bone spicules pigmentation	Outer retina thinning, relatively preserved foveal lamination	NA
191562	F	S	NO	12	14	0.6/0.4	NO	Extinguishing	RP	p.F2699S	p.L2770P	RPE atrophy in peripheral retina, macular normal	outer retina thinning, relatively preserved foveal lamination	NA
77031	M	AR	NO	20	23	0.8/0.9	NO	NA	RP	p.I1752Nfs*18	p.W2090X	Bone spicules pigmentation in peripheral retina, macular normal	NA	NA
10364	M	S	YES	5	31	0.15/0.3	NO	SD	CORD	p.Y2935X	p.Y2935X	Marked atrophy of macular	All retinal layers appear to be affected,severe atrophy of the outer retina	Dark macular area, Hyper AF ring within the vascular arcade
Abbreviations：F=female; M=male;FH=family history;S=sporadic; AR=autosomal recessive; BCVA=best corrected visual acuity; OD=right eye; OS= left eye; HM= hand move; NLP= no light perception; SD=severe decline
